# Supplementary material for: Butterflyene: an entry into an aesthetically pleasing carbocycle via a Diels–Alder reaction on a tetrasubstituted olefin
Source: Royal Society of Chemistry journal article supplement (doi:10.1039/d3ob01056b), 2023-01-01
Supplement: d3ob01056b1.pdf [file d3ob01056b1.pdf]

## SUPPORTING INFORMATION

### **Butterflyene: An entry into an aesthetically pleasing carbocycle *via* Diels–Alder Reaction on a Tetrasubstituted olefin**

Gaurang J. Bhatt,<sup>†</sup> Pradeep T. Deota,<sup>†,\*</sup> Narayan N. Som,<sup>‡</sup> Darshil Shah<sup>¥</sup>

<sup>†</sup>Applied Chemistry Department, Faculty of Technology & Engineering, The Maharaja Sayajirao  
University of Baroda, Vadodara-390 001, Gujarat, India  
E-mail: [ptdeota-appchem@msubaroda.ac.in](mailto:ptdeota-appchem@msubaroda.ac.in)  
[deotapt@yahoo.com](mailto:deotapt@yahoo.com)

<sup>‡</sup>Materials Design Division, Faculty of Materials Science and Engineering, Warsaw University  
of Technology, 141 Wołoska Str., 02-507 Warsaw, Poland

<sup>¥</sup>Department of Chemical Engineering, Faculty of Technology & Engineering, The Maharaja  
Sayajirao University of Baroda, Vadodara-390 001, Gujarat, India

|                                                       |                 |
|-------------------------------------------------------|-----------------|
| <b>Table of Contents.....</b>                         | <b>Page no.</b> |
| <b>Experimental Procedures.....</b>                   | <b>S3</b>       |
| <b>References.....</b>                                | <b>S4</b>       |
| <b>Spectral data.....</b>                             | <b>S5-S23</b>   |
| <b>Optimized Atomic Coordinates of Compounds.....</b> | <b>S24</b>      |

## Experimental Procedures:

### General Information

All the chemicals were purchased from Sigma Aldrich, Spectrochem and SD Fine-Chem Limited. All solvents were dried and distilled prior to use and stored on oven dried molecular sieves. All the compounds were purified by column chromatography using Acme silica gel (60-120 mesh). Thin Layer Chromatography was performed on silica gel aluminium plates. The spots were visualized under UV light or with iodine vapour. The melting points of all synthesized compounds were recorded under optical Polarized Light Microscope attached with Nikon camera and Linkam heating stage. IR spectra were recorded on a SHIMADZU FTIR-245068 spectrophotometer over KBr pellets. Bruker Avance 400 MHz & 600 MHz NMR was used to record  $^1\text{H}$  &  $^{13}\text{C}$  NMR spectra. HRMS data of final compounds were recorded in XEVO G2-XS QTOF Mass Spectrometer from IIT Ropar.

### Typical procedure for synthesis of trindane 1

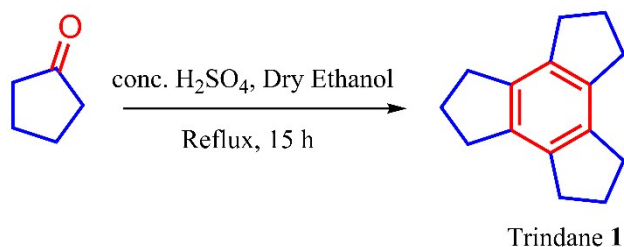

**Scheme S1**

Cyclopentanone (16 ml, 180 mmol) and dry ethanol (18 ml) was taken in two-neck round-bottomed flask (100 mL) equipped with a condenser. A dropwise addition of concentrated sulfuric acid (8 ml, 150 mmol) into reaction mixture followed by refluxed for 15 h. After completion of reaction, mixture was poured on to ice, neutralized with sodium carbonate and extracted with ethyl acetate (3 x 30 ml). Organic layer was washed with water, brine and dried over  $\text{Na}_2\text{SO}_4$ . Removal of solvent under reduced pressure furnished a dark brown liquid which was chromatographed on

a column of silica gel using light petroleum to furnished trindane as white solid (3.8 g, 32 %Yield); mp 90 °C (lit 95–97 °C)<sup>[1]</sup>

### General procedure for synthesis of trindan-1-one 6

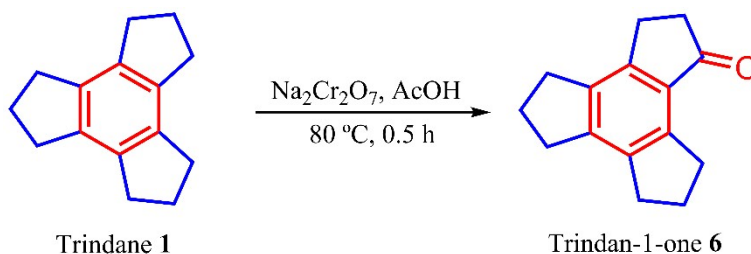

**Scheme S2**

Trindane (2.50 g, 12.62 mmol) was dissolved in glacial acetic acid (25 mL) and the stirred solution was maintained at 80 °C. Sodium dichromate dihydrate (4.50 g, 15.14 mmol, 1.2 equiv.) in glacial acetic acid (20 mL) was added dropwise at 80 °C. After 30 min reaction mixture was poured into ice water and the precipitate which formed was separated, washed with water (2 × 10 mL) and dried under vacuum. Resulted light yellow solid was then chromatographed on a column of silica gel using light petroleum and ethyl acetate (98:2) to furnished trindan-1-one as white solid (1.5 g, 56 %Yield); mp 115 °C (lit 115 °C)<sup>[2]</sup>; IR (KBr cm<sup>-1</sup>): 2953, 1703, <sup>1</sup>H NMR (600 MHz, CDCl<sub>3</sub>) δ 3.21 (t, *J* = 7.5 Hz, 2H), 3.00 – 2.95 (m, 2H), 2.88 (t, *J* = 7.5 Hz, 4H), 2.79 (t, *J* = 7.5 Hz, 2H), 2.68 – 2.64 (m, 2H), 2.19 – 2.12 (m, 4H); <sup>13</sup>C NMR (151 MHz, CDCl<sub>3</sub>) δ 207.71, 149.53, 147.05, 141.39, 139.96, 139.18, 131.49, 36.89, 31.96, 30.97, 30.39, 30.00, 25.55, 25.16, 24.59.

### References

- [1] S. Ranganathan, K. M. Muraleedharan, P. Bharadwaj and K. P. Madhusudanan, *Chem. Commun.* **1998**, 2239–2240.
- [2] R. J. Ferrier, S. G. Holden and O. Gladkikh, *J. Chem. Soc., Perkin Trans. 1*, **2000**, 3505

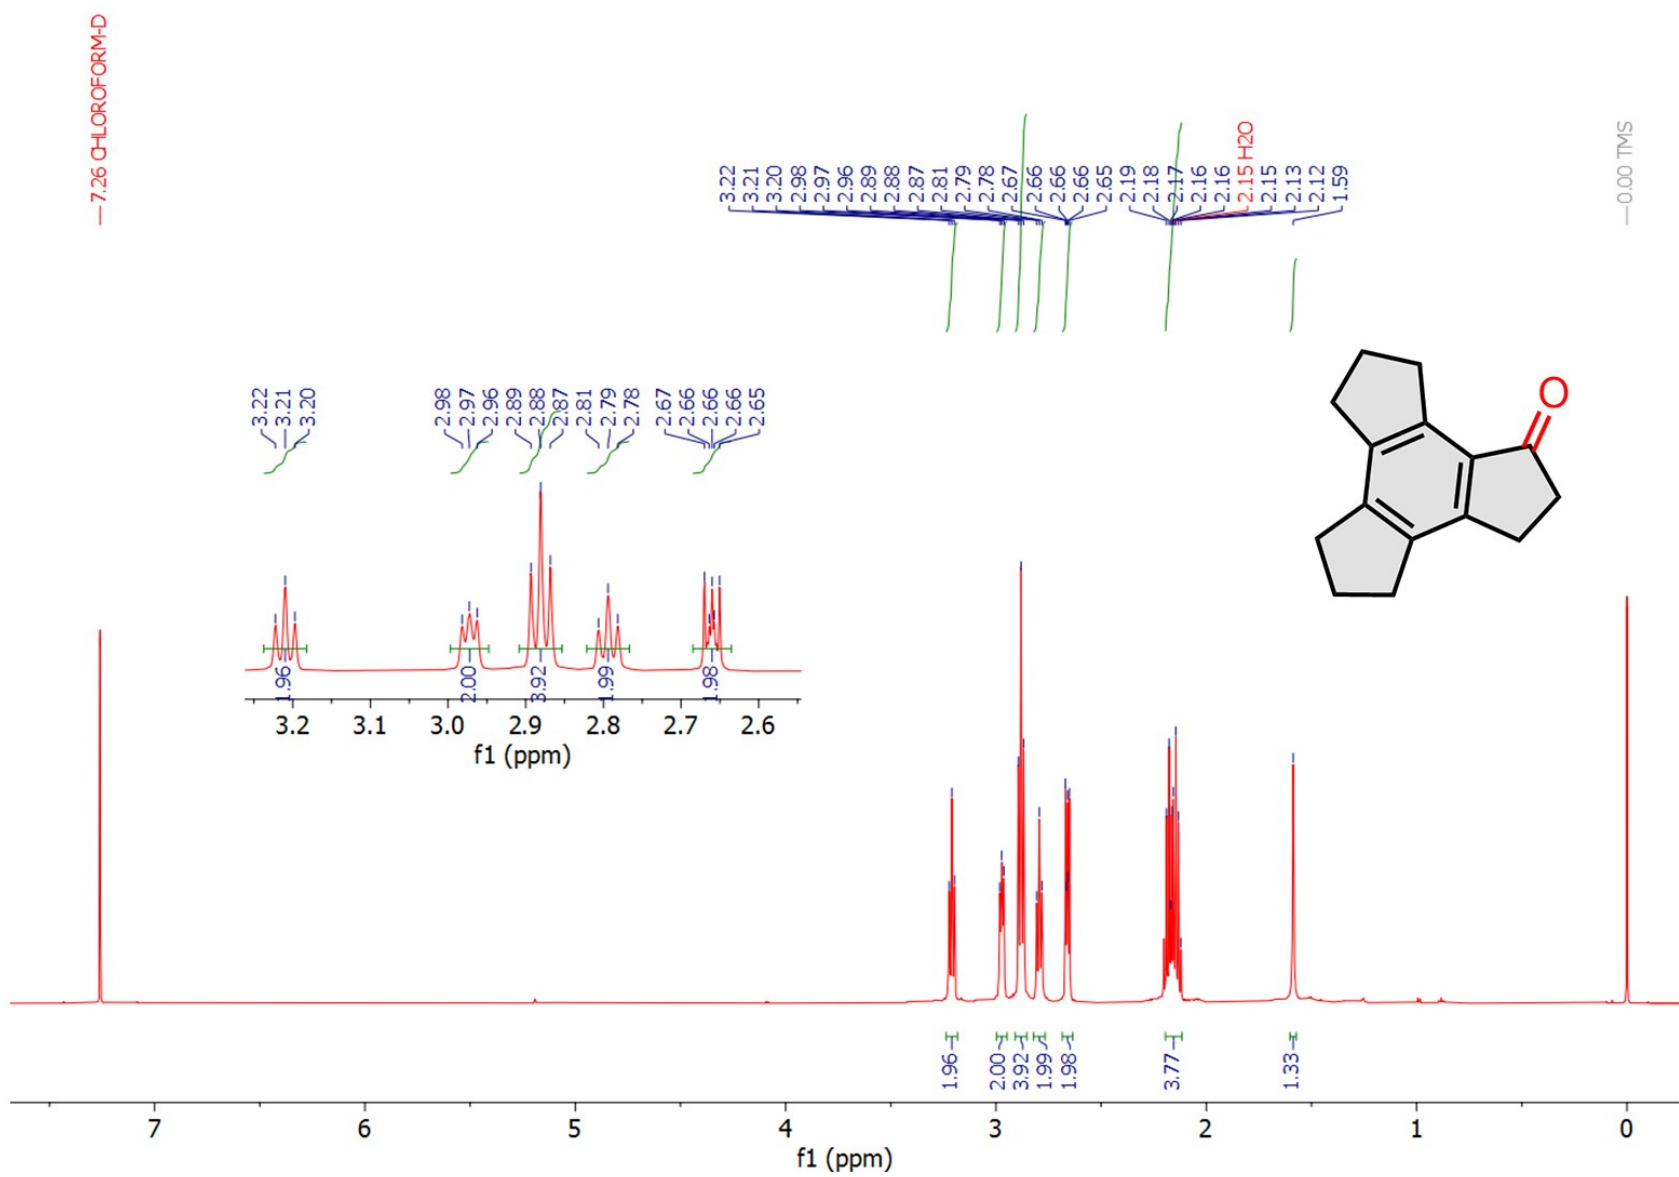

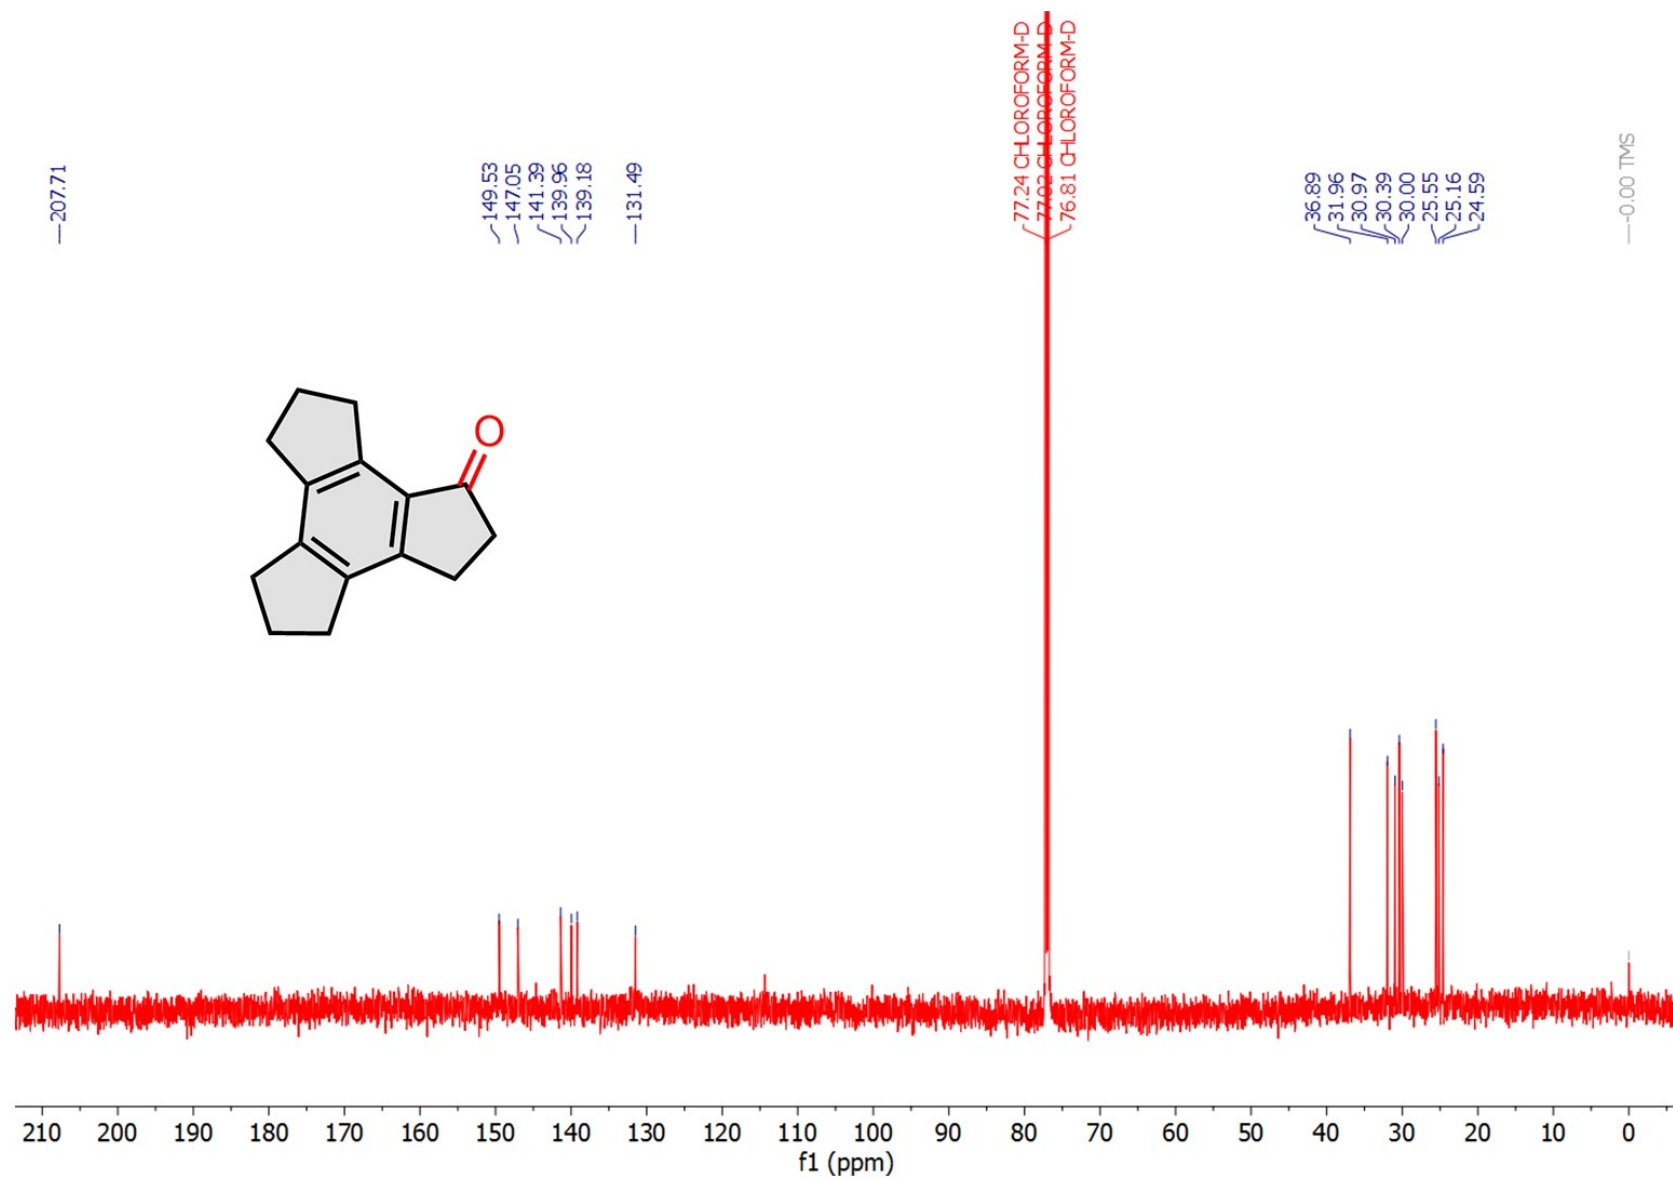

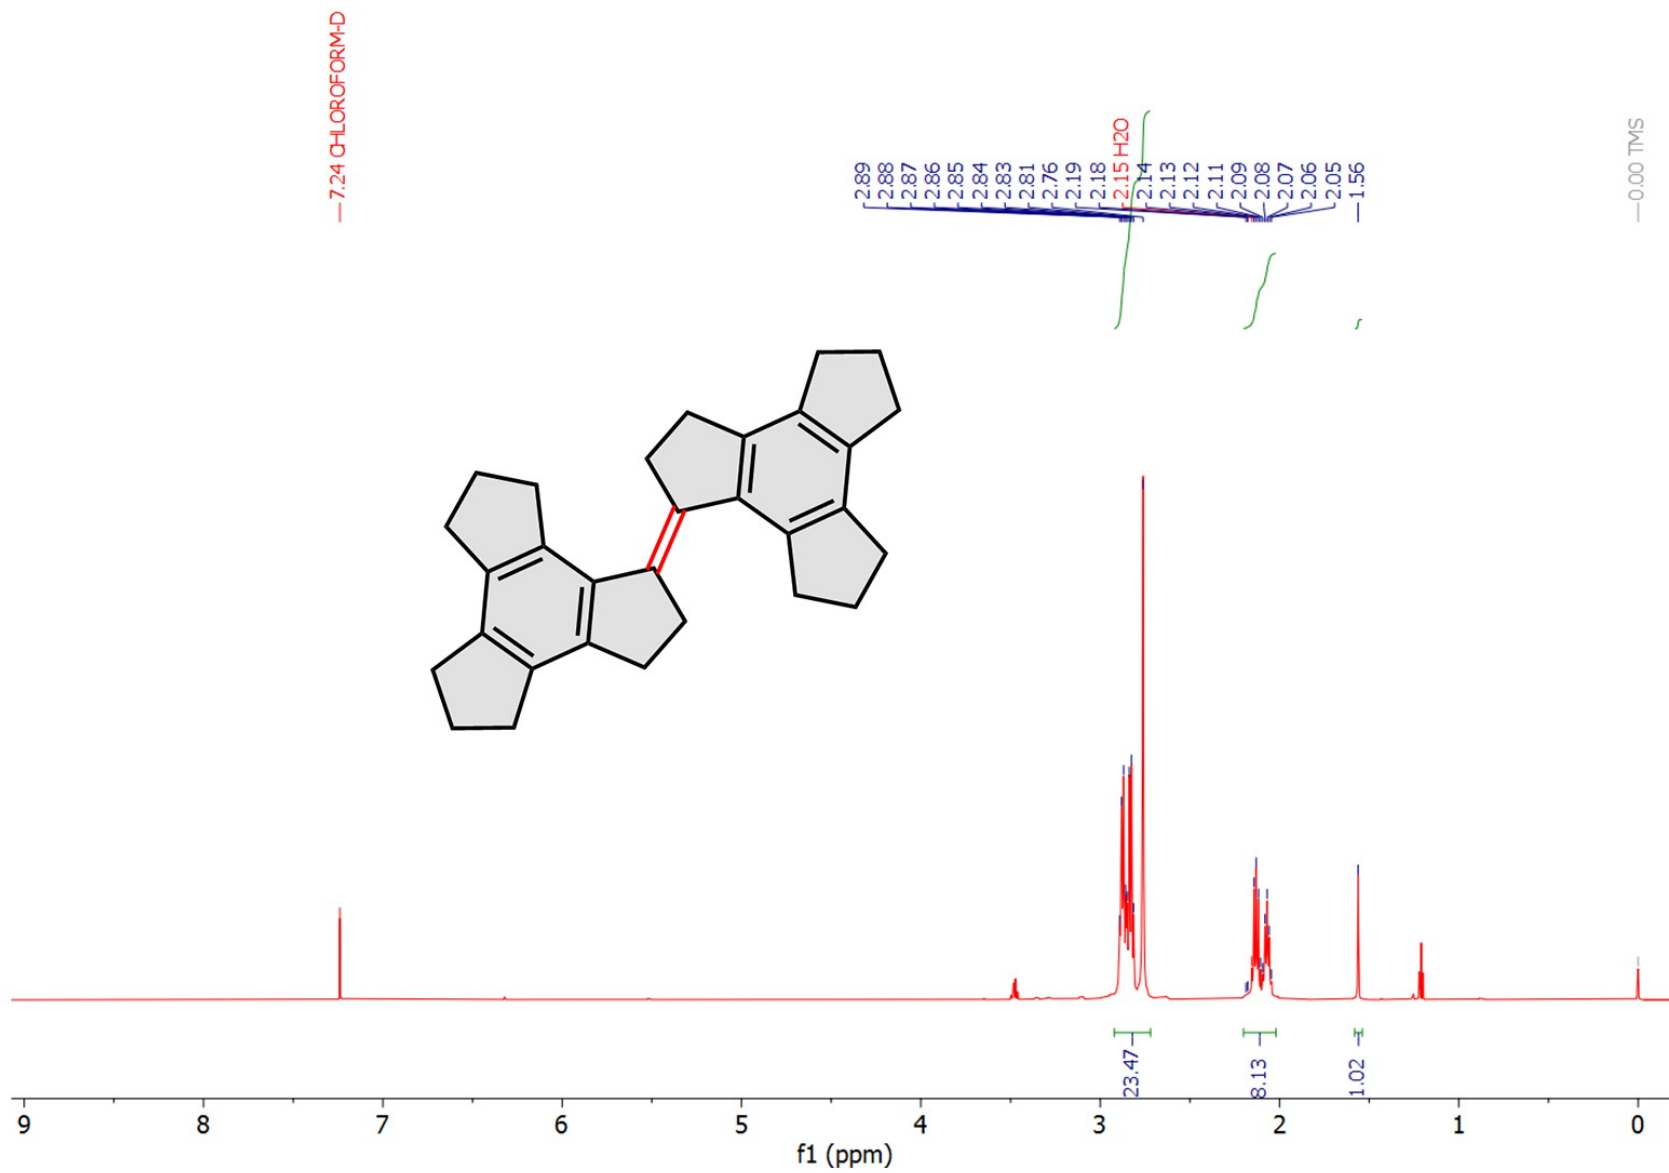

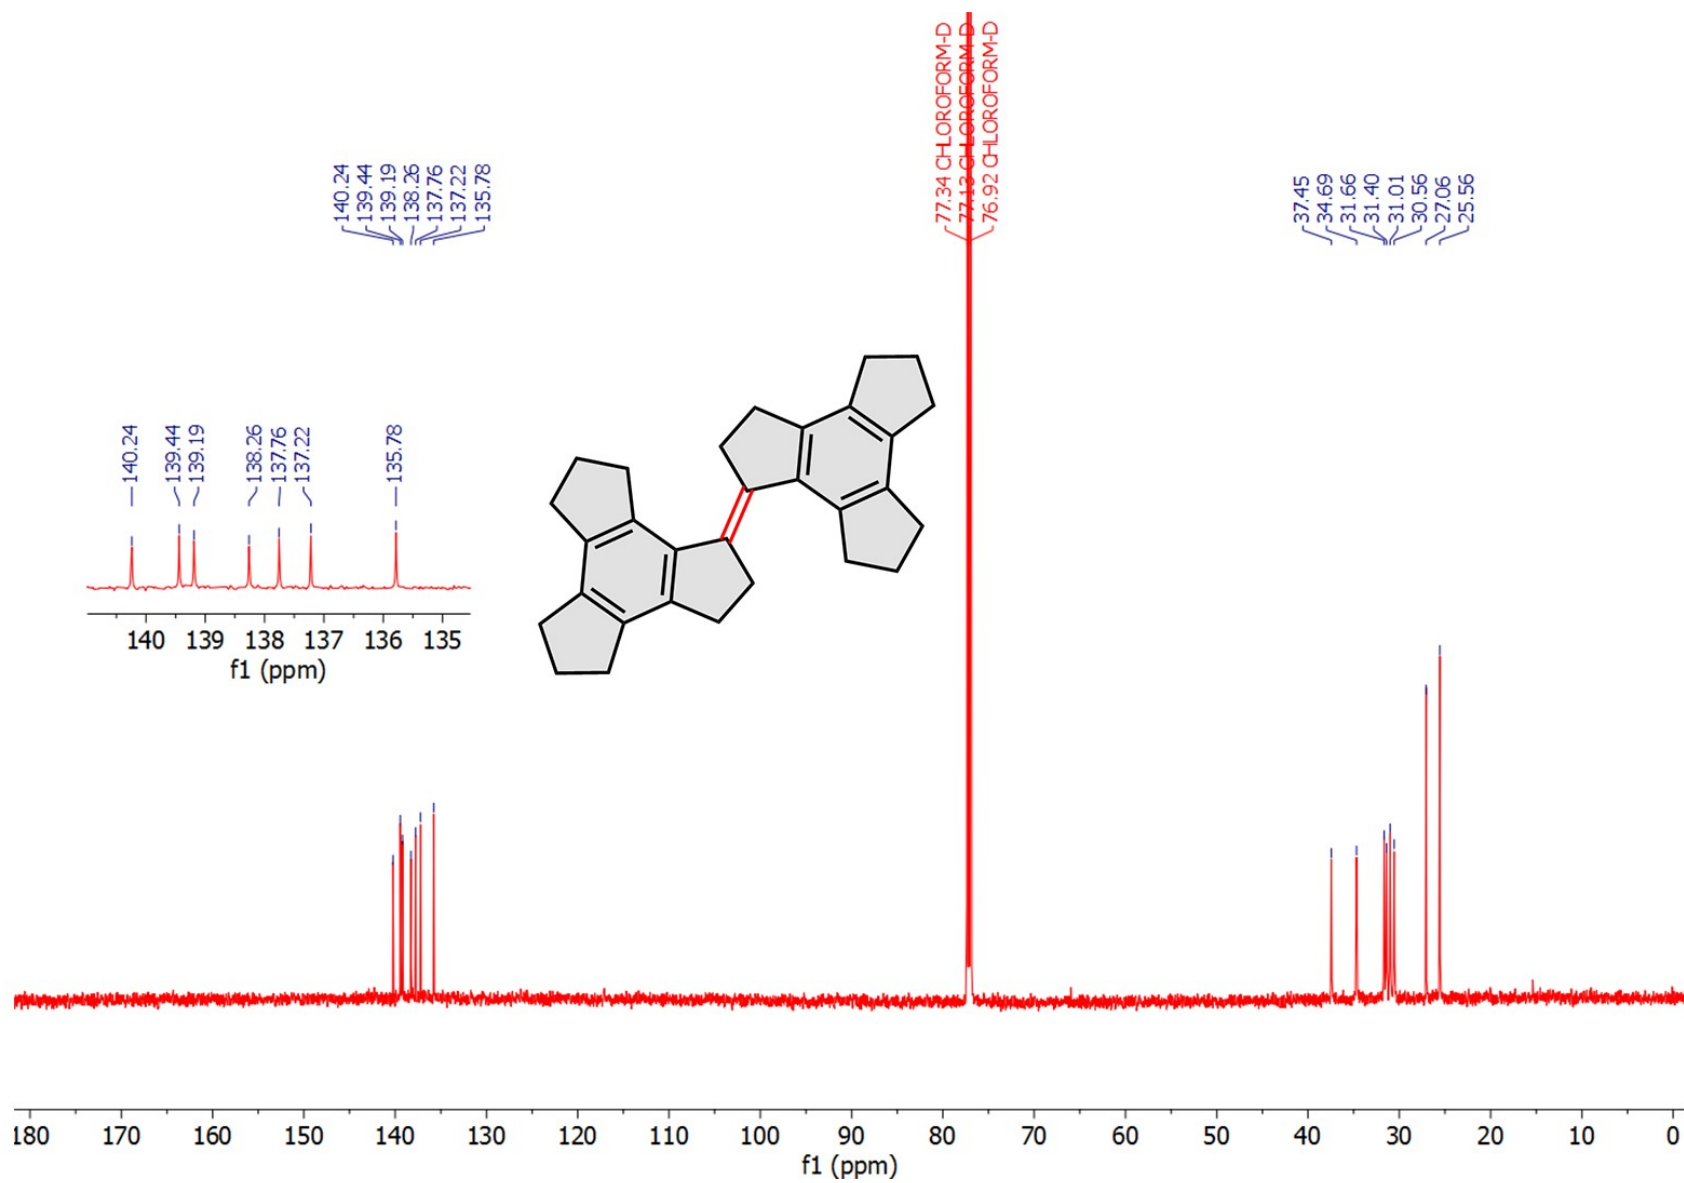



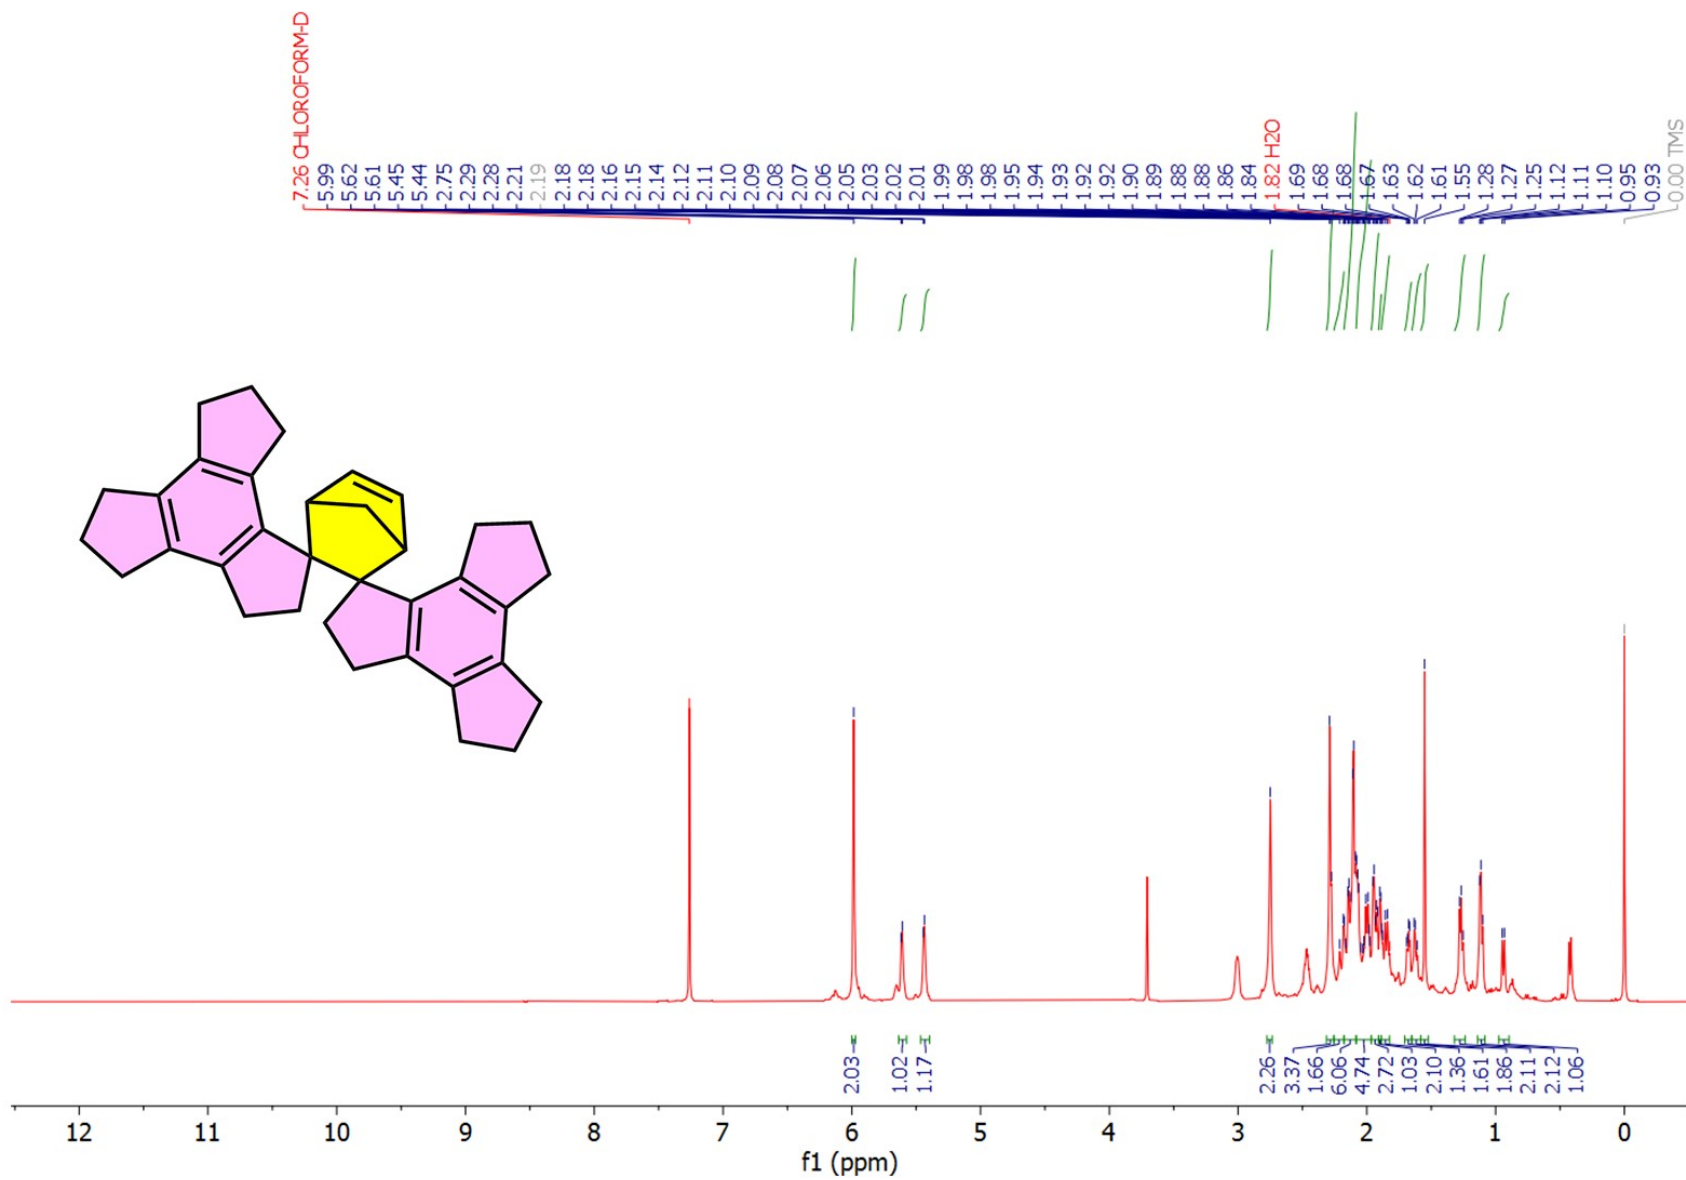

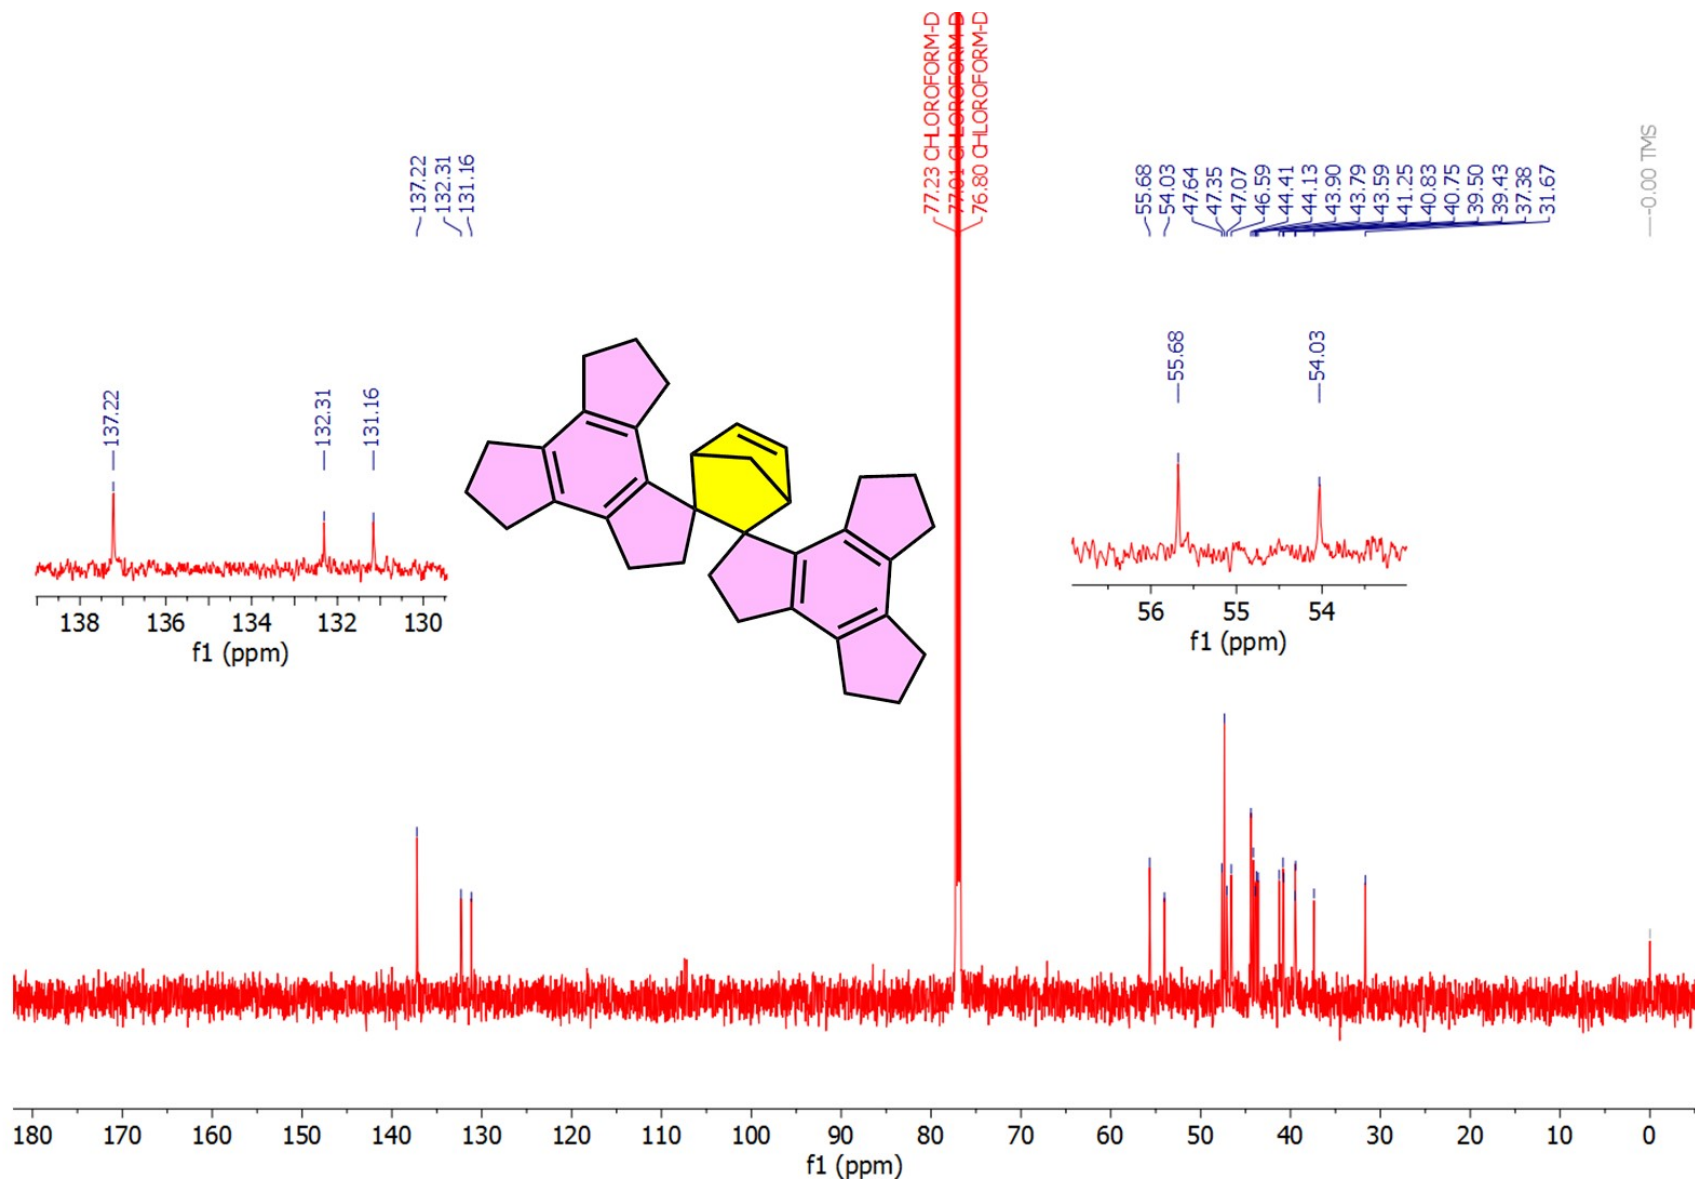

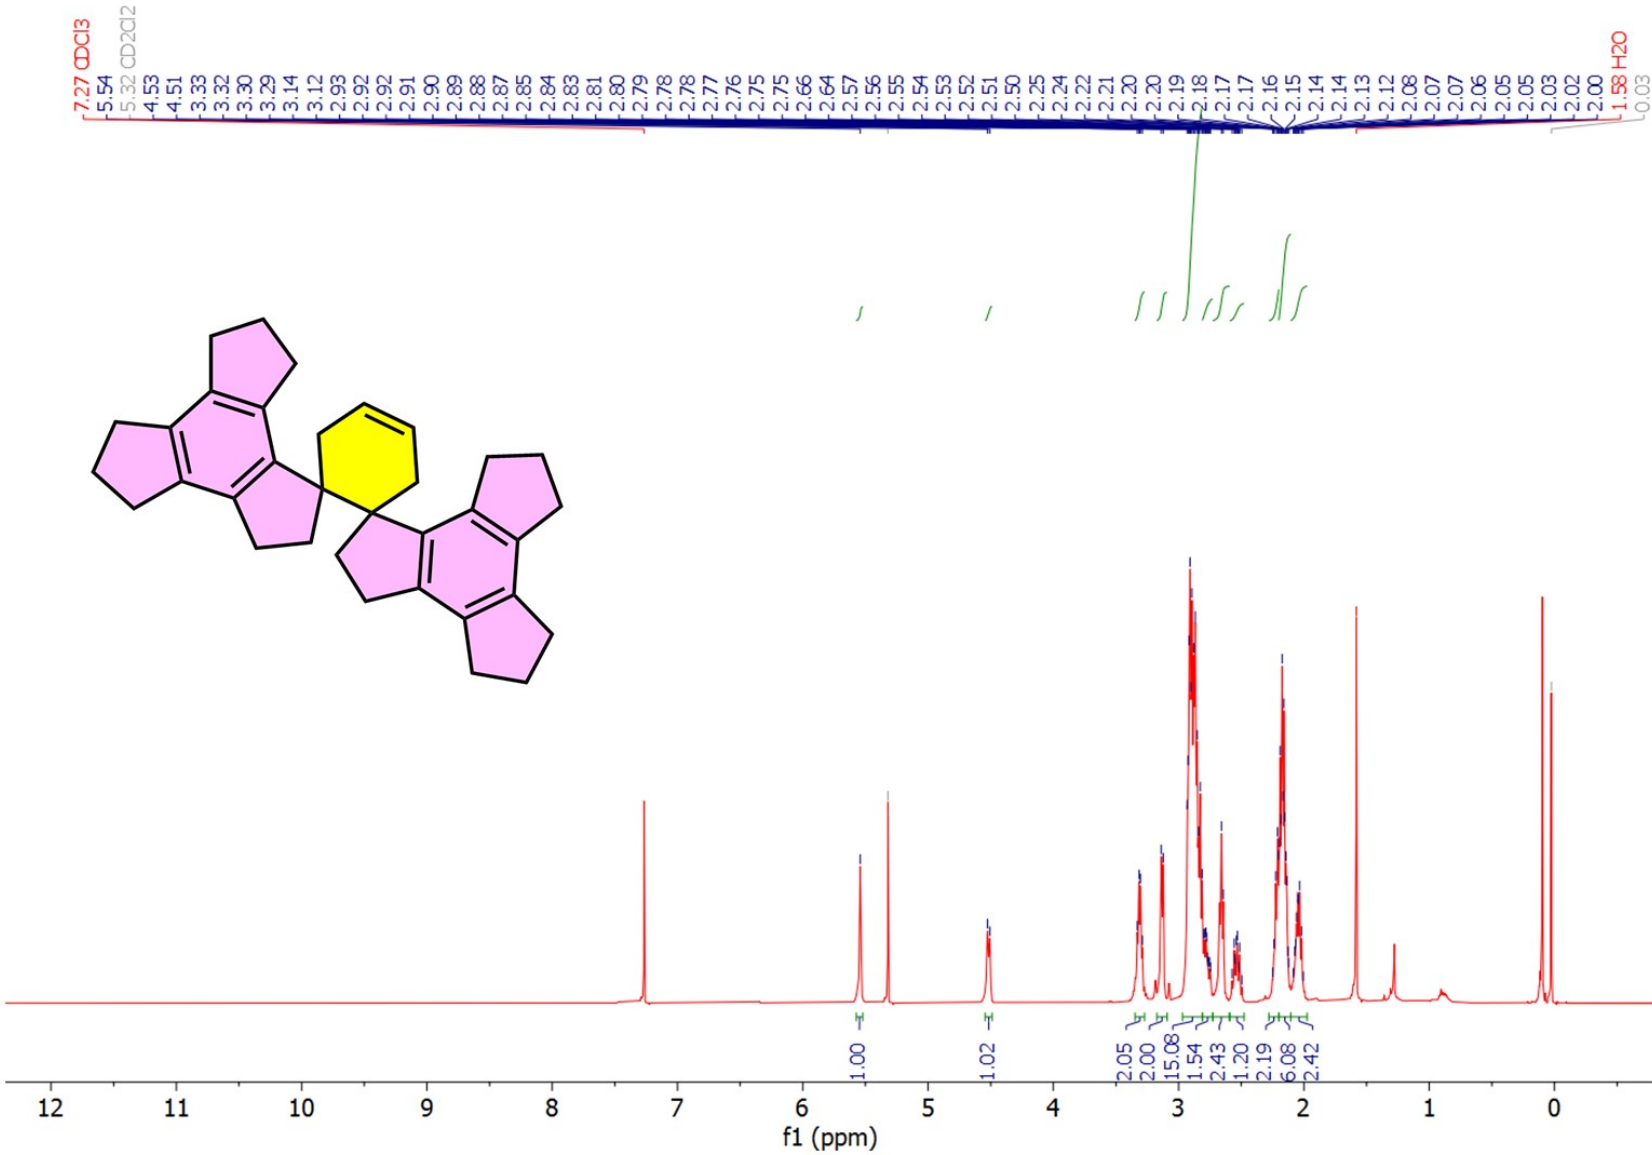

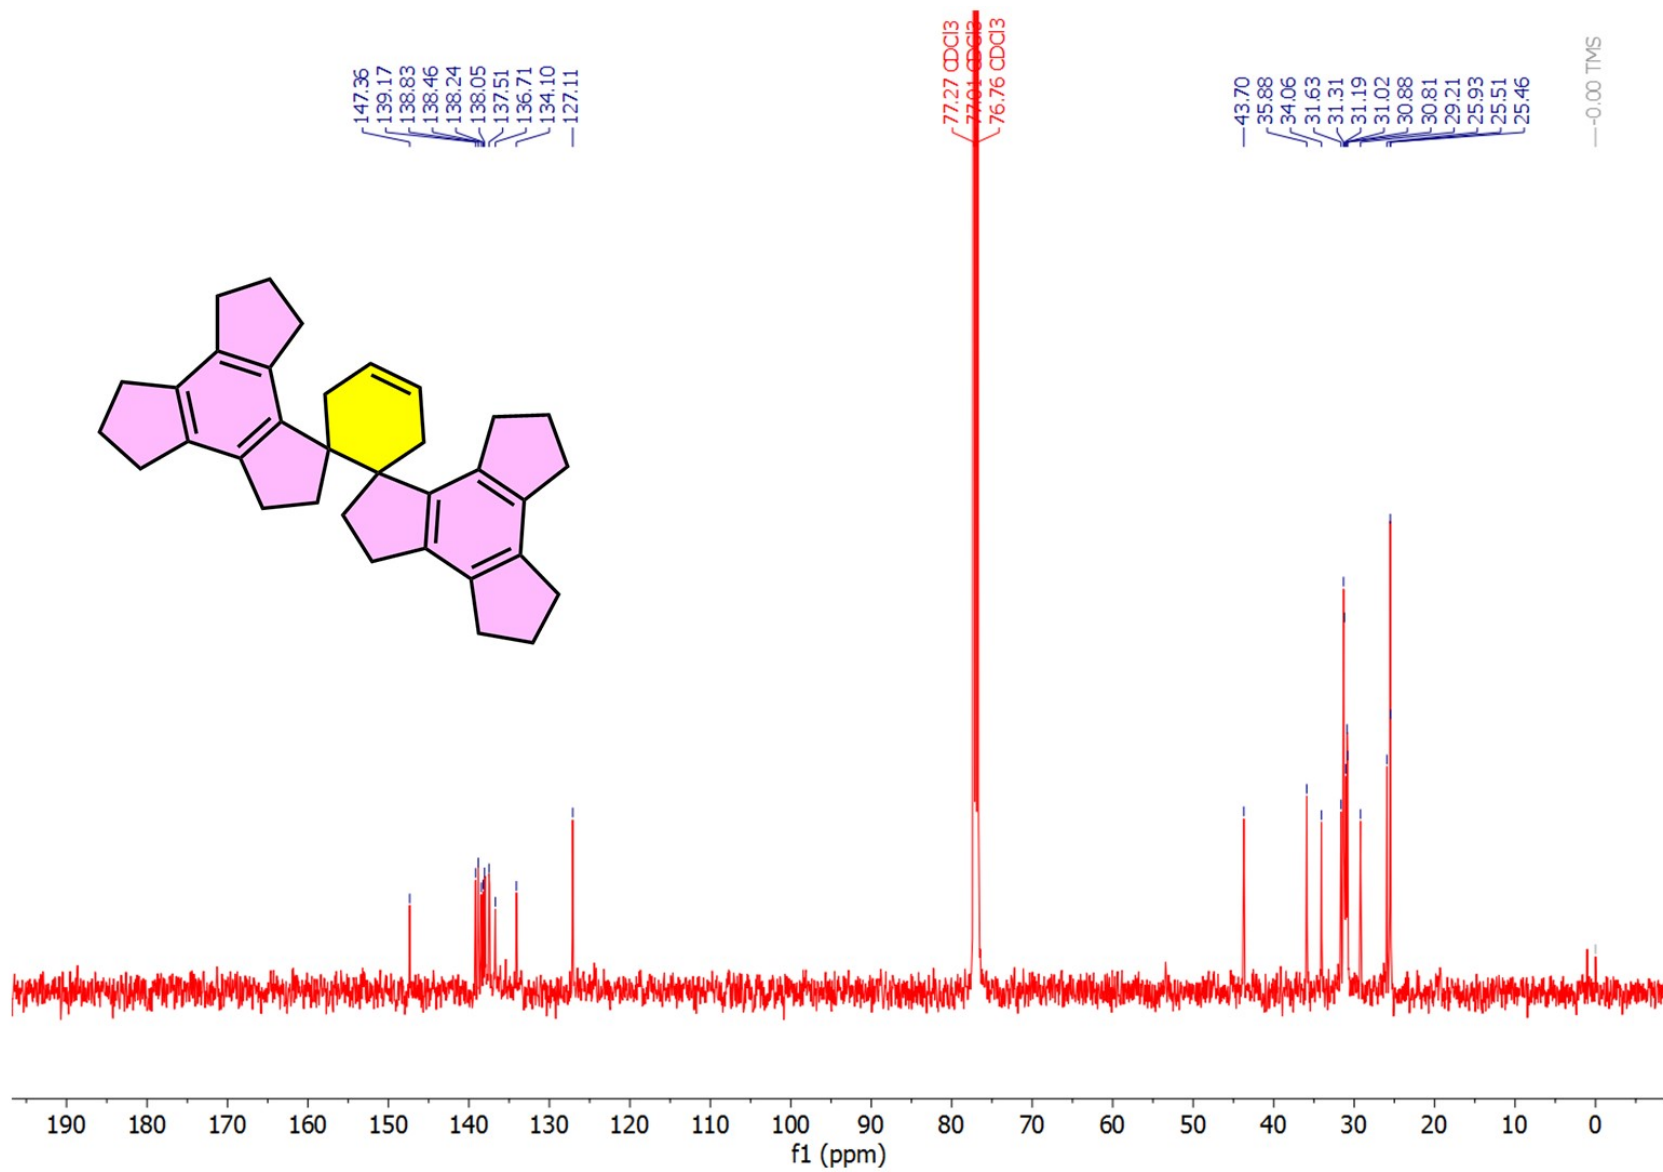

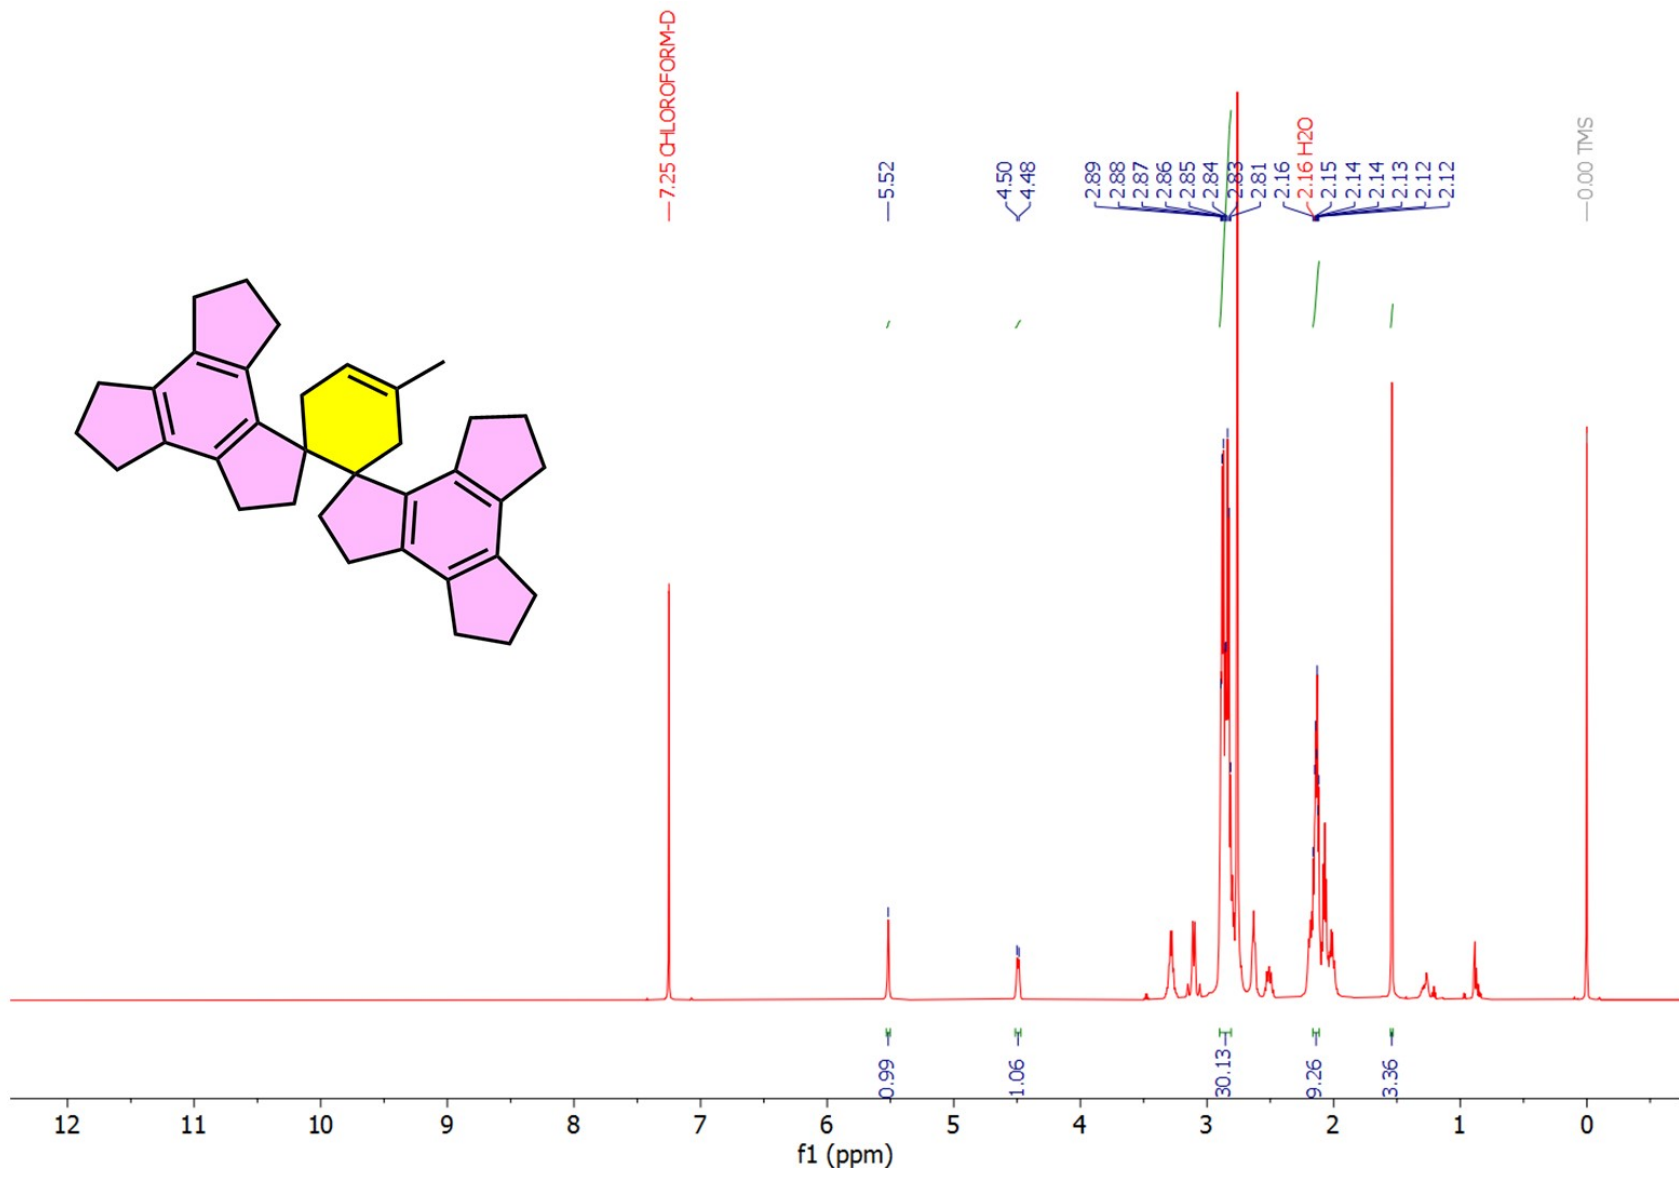

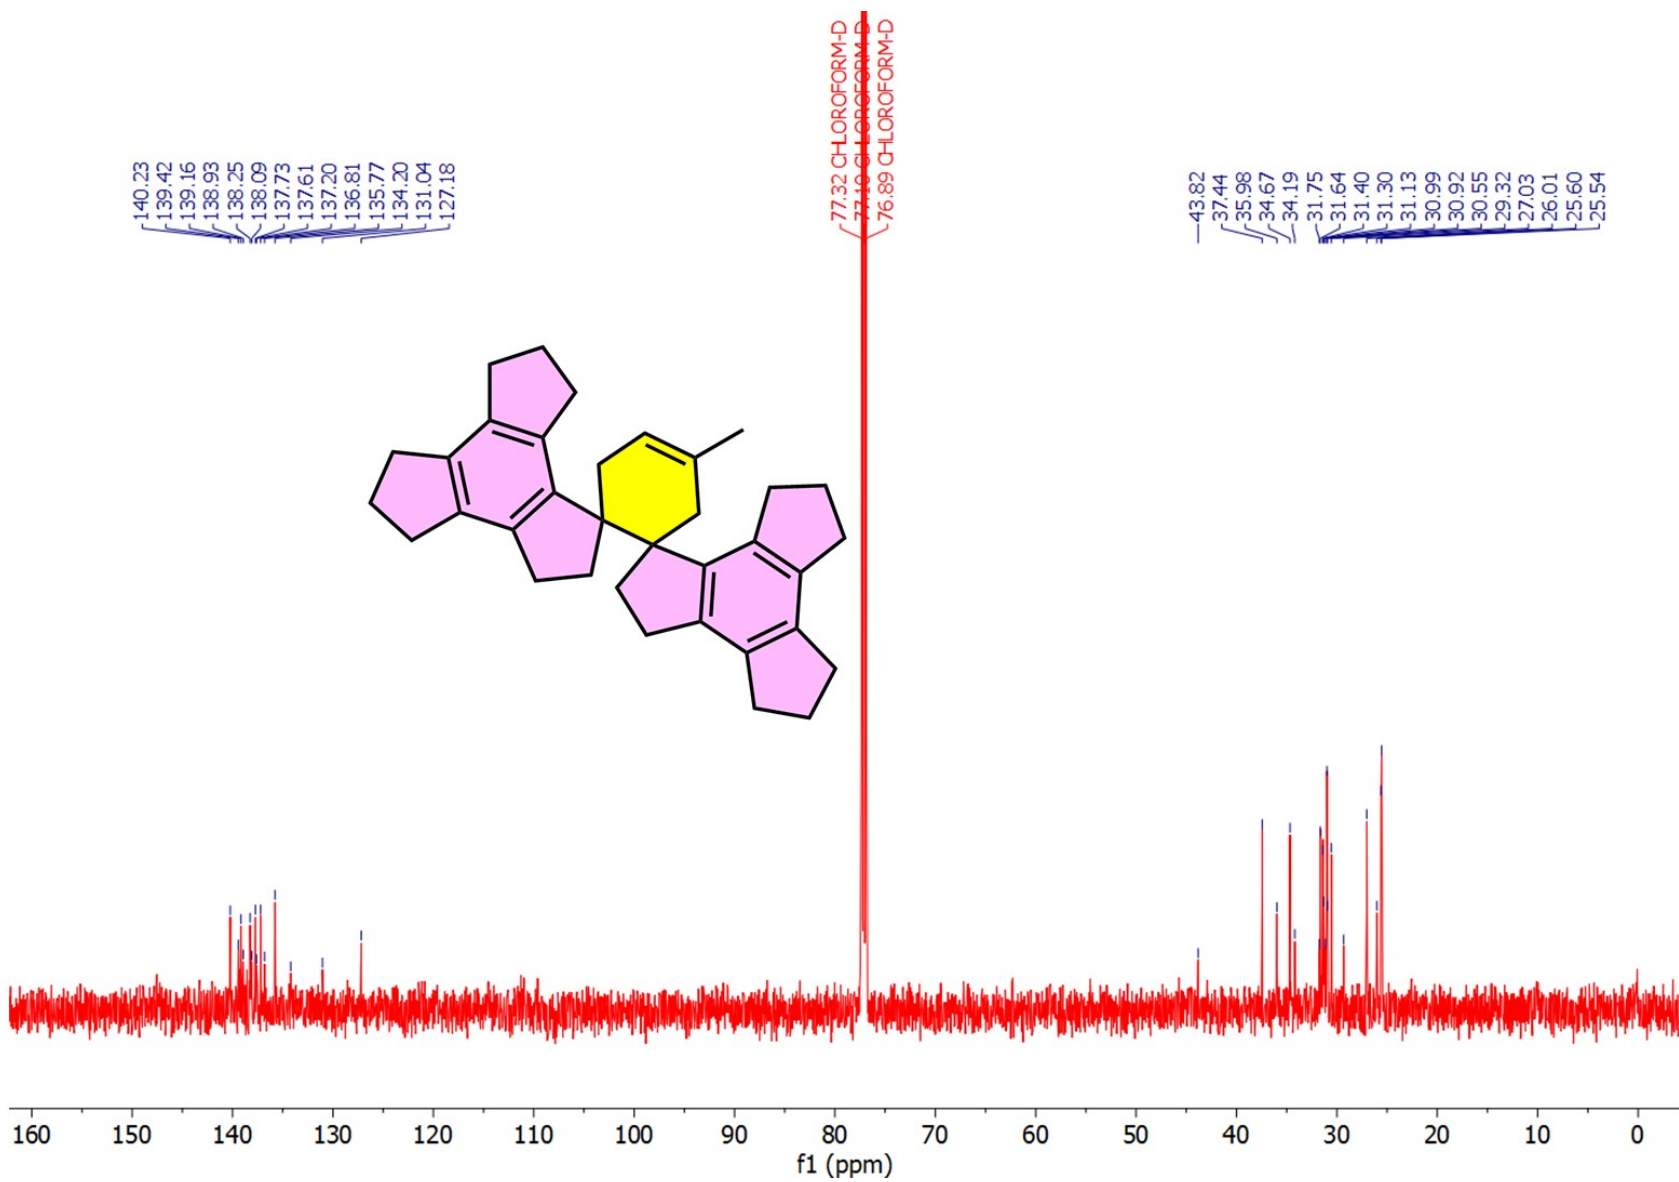

## Elemental Composition Report

### Single Mass Analysis

Tolerance = 10.0 PPM / DBE: min = -1.5, max = 50.0

Element prediction: Off

Number of isotope peaks used for i-FIT = 5

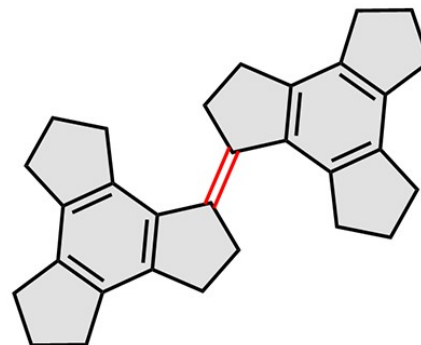

Page 1

Monoisotopic Mass, Even Electron Ions

489 formula(e) evaluated with 5 results within limits (up to 1 closest results for each mass)

Elements Used:

C: 0-50 H: 0-50 N: 0-10 O: 0-10

Sample Name : GB042

Test Name :

11032022\_GB042 57 (1.198)

IITRPR

XEVO G2-XS QTOF

1: TOF MS ES+  
8.33e+004

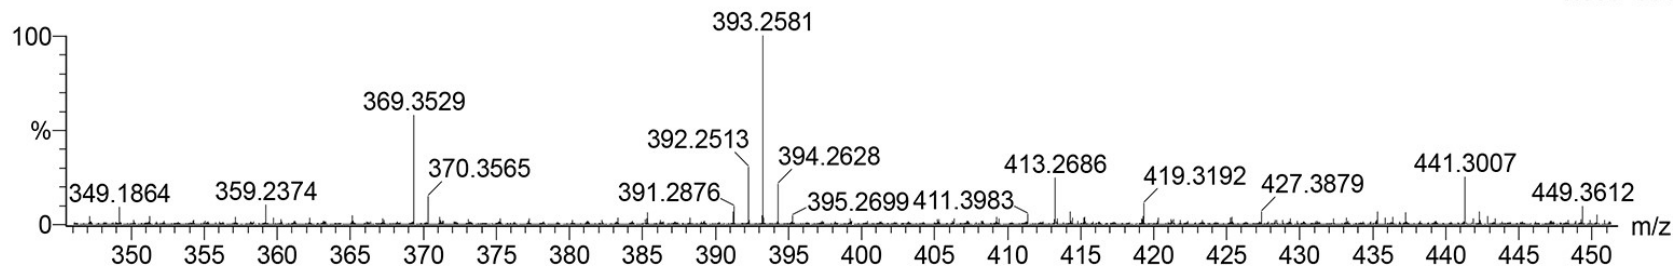

Minimum: -1.5  
Maximum: 2.0 10.0 50.0

| Mass     | Calc. Mass | mDa  | PPM  | DBE  | i-FIT  | Norm | Conf (%) | Formula |
|----------|------------|------|------|------|--------|------|----------|---------|
| 393.2581 | 393.2582   | -0.1 | -0.3 | 14.5 | 1303.6 | n/a  | n/a      | C30 H33 |

# Elemental Composition Report

## Single Mass Analysis

Tolerance = 10.0 PPM / DBE: min = -1.5, max = 50.0  
Element prediction: Off  
Number of isotope peaks used for i-FIT = 5

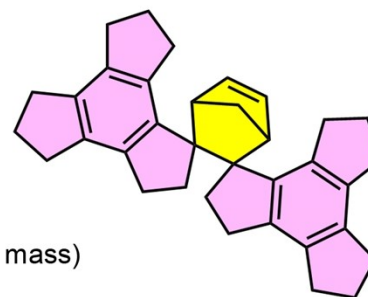

Monoisotopic Mass, Even Electron Ions

516 formula(e) evaluated with 6 results within limits (up to 1 closest results for each mass)

Elements Used:

C: 0-50 H: 0-50 N: 0-10 O: 0-10

Sample Name : GB051

Test Name :

11032022\_GB051 4 (0.107)

IITRPR

XEVO G2-XS QTOF

1: TOF MS ES+  
1.12e+004

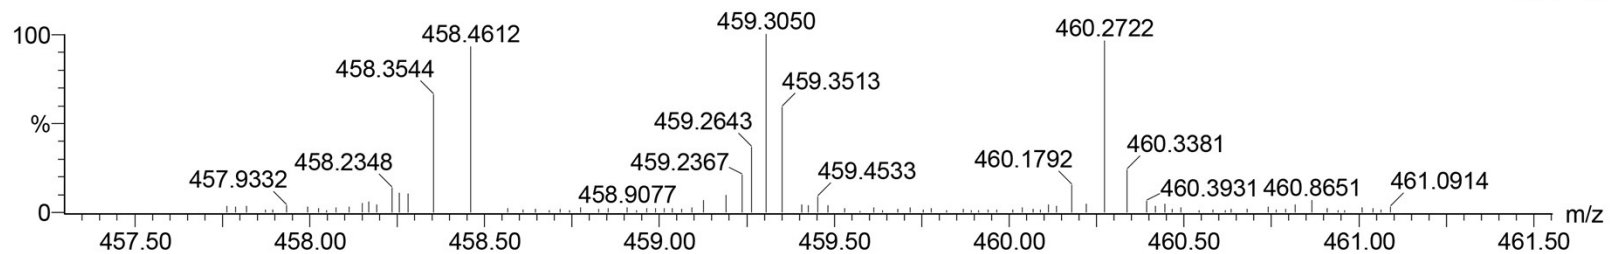

Minimum: -1.5  
Maximum: 2.0 10.0 50.0

| Mass     | Calc. Mass | mDa  | PPM  | DBE  | i-FIT | Norm | Conf (%) | Formula |
|----------|------------|------|------|------|-------|------|----------|---------|
| 459.3050 | 459.3052   | -0.2 | -0.4 | 16.5 | 600.7 | n/a  | n/a      | C35 H39 |



Sample Name : GB057  
Test Name :  
11032022\_GB057 4 (0.107)

IITRPR

XEVO G2-XS QTOF

1: TOF MS ES+  
7.47e6

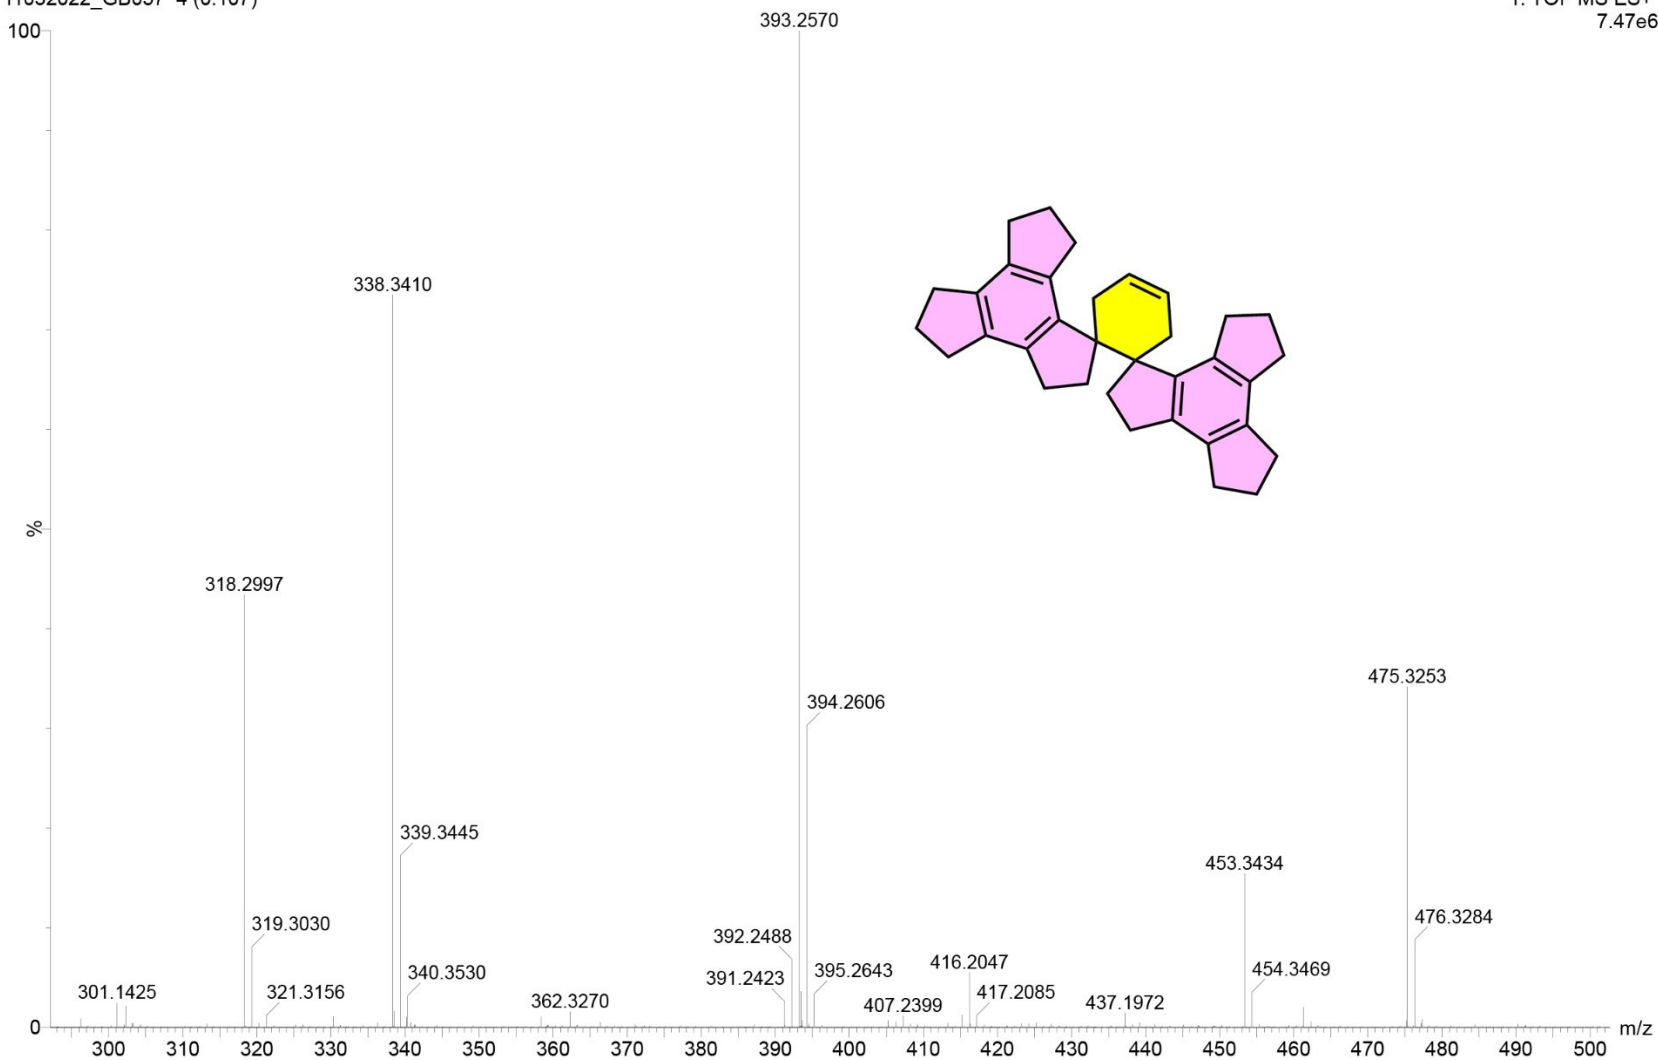

# Elemental Composition Report

## Single Mass Analysis

Tolerance = 10.0 PPM / DBE: min = -1.5, max = 50.0

Element prediction: Off

Number of isotope peaks used for i-FIT = 5

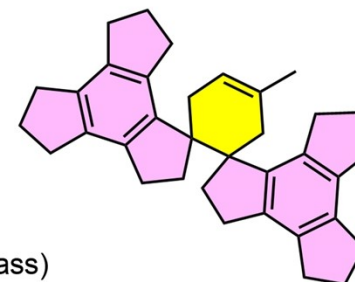

Monoisotopic Mass, Even Electron Ions

517 formula(e) evaluated with 6 results within limits (up to 1 closest results for each mass)

Elements Used:

C: 0-50 H: 0-50 N: 0-10 O: 0-10

Sample Name : GB051

IITRPR

XEVO G2-XS QTOF

Test Name :

11032022\_GB053 3 (0.079)

1: TOF MS ES+  
3.34e+004

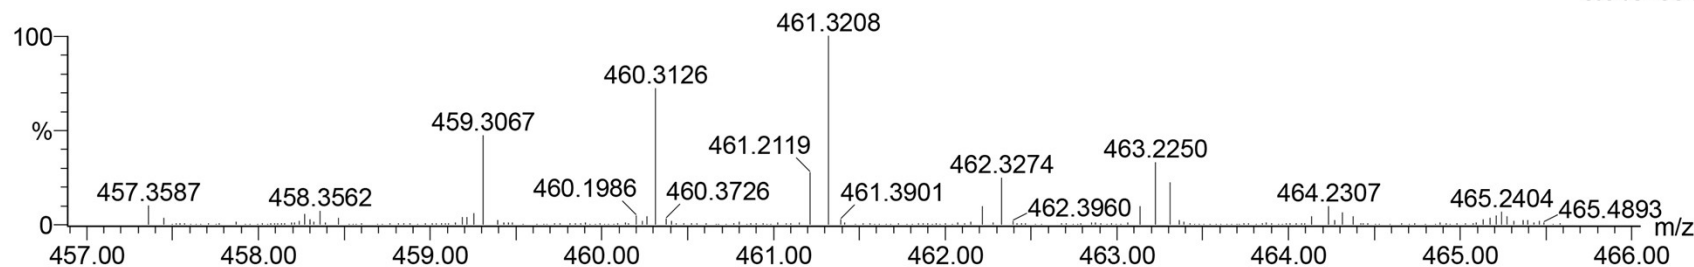

Minimum: -1.5  
Maximum: 2.0 10.0 50.0

| Mass     | Calc. Mass | mDa | PPM | DBE  | i-FIT  | Norm | Conf (%) | Formula |
|----------|------------|-----|-----|------|--------|------|----------|---------|
| 461.3208 | 461.3208   | 0.0 | 0.0 | 15.5 | 1074.7 | n/a  | n/a      | C35 H41 |

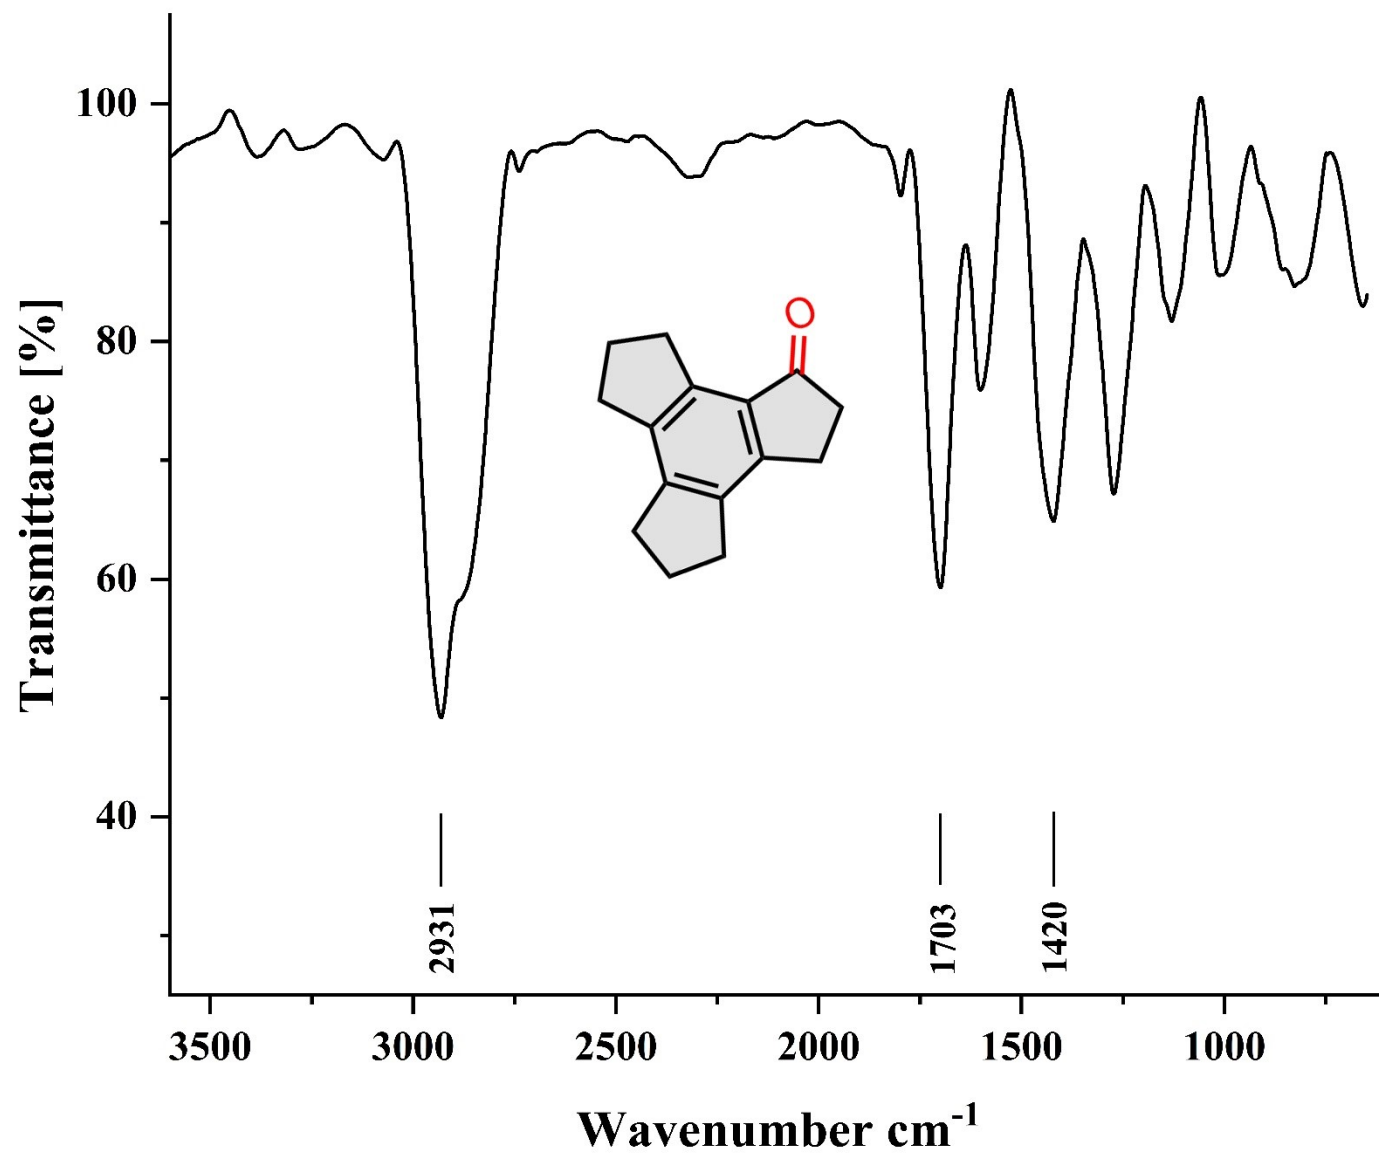

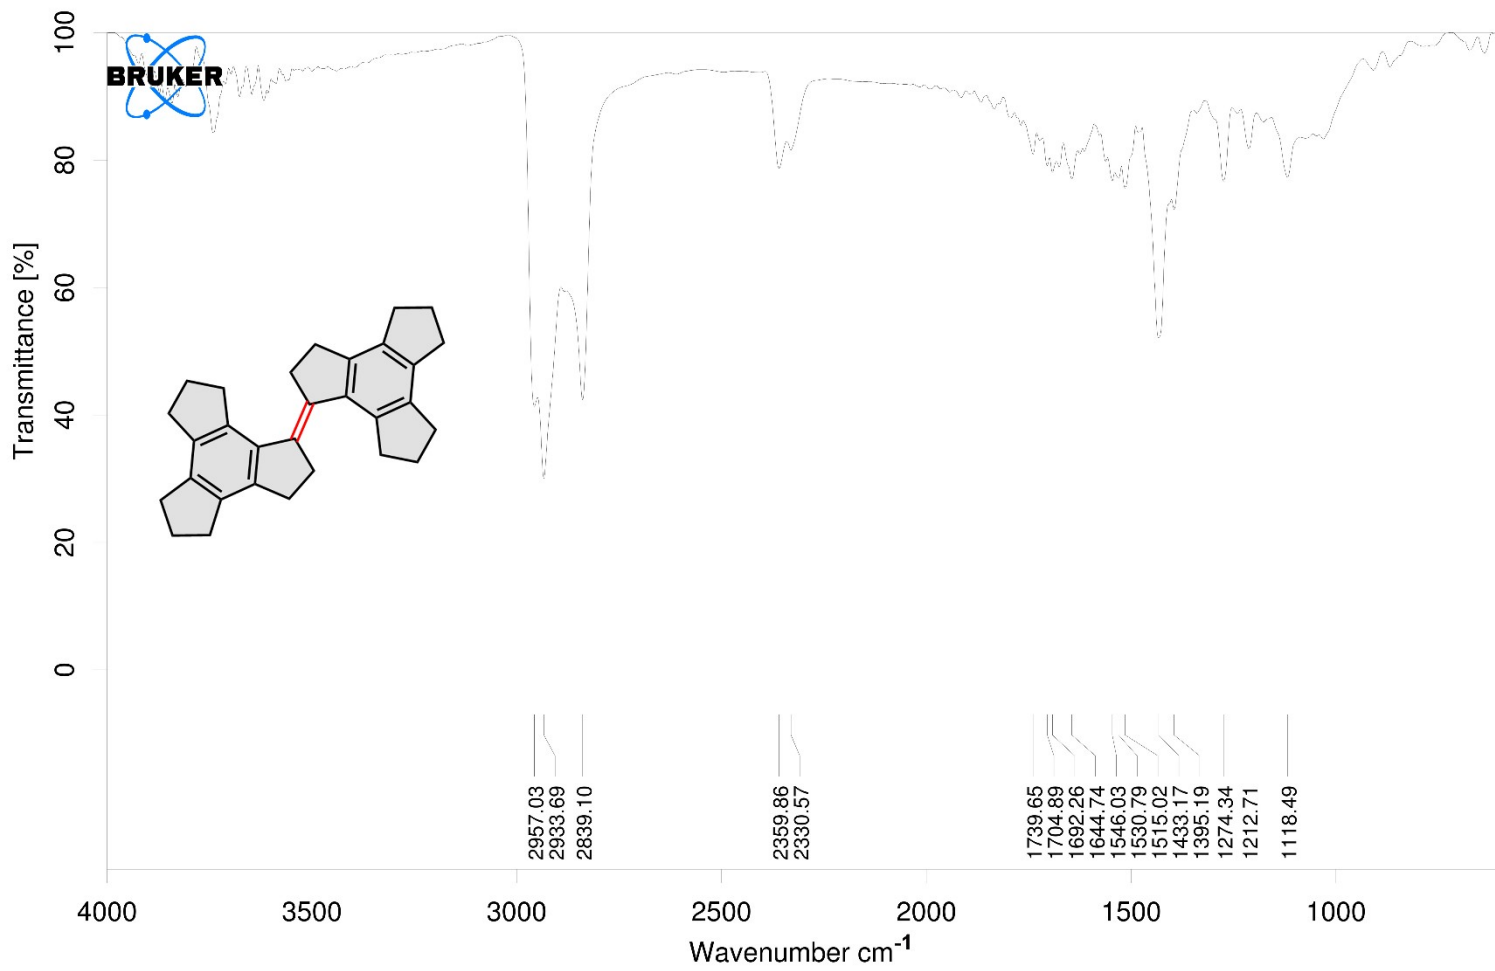

C:\Program Files\OPUS\_65\MEAS\GB042.0 GB042 Instrument type and / or accessory

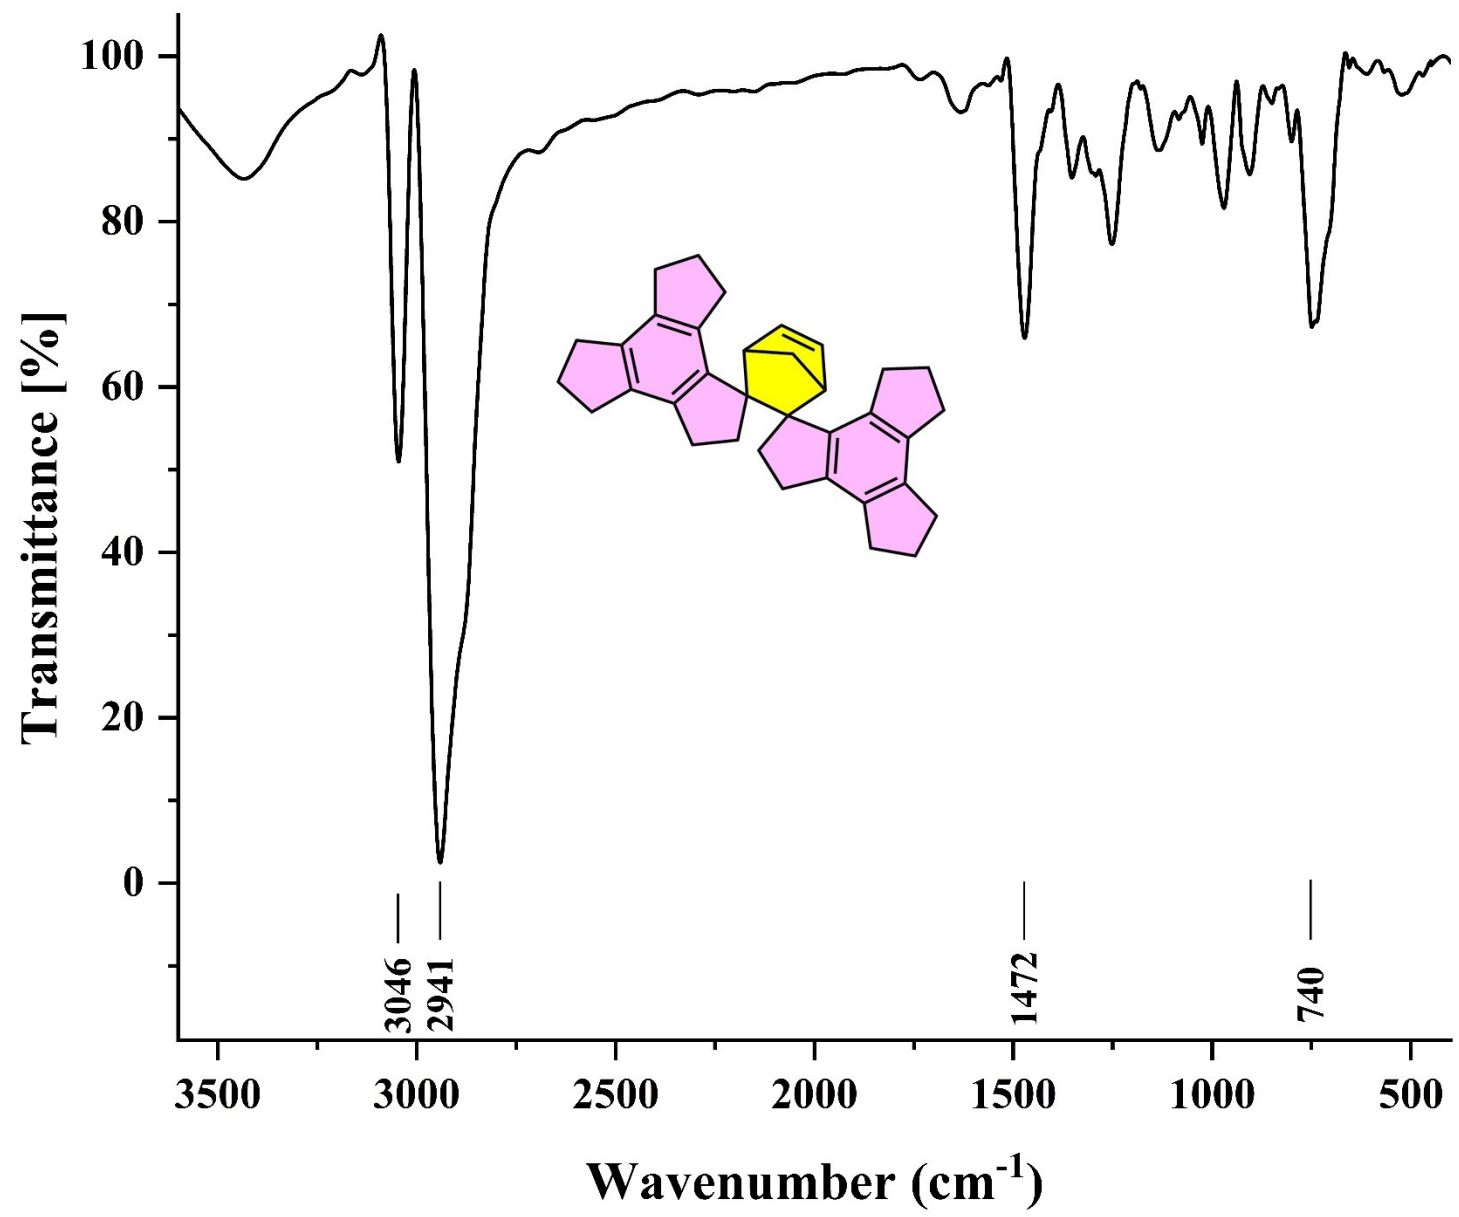

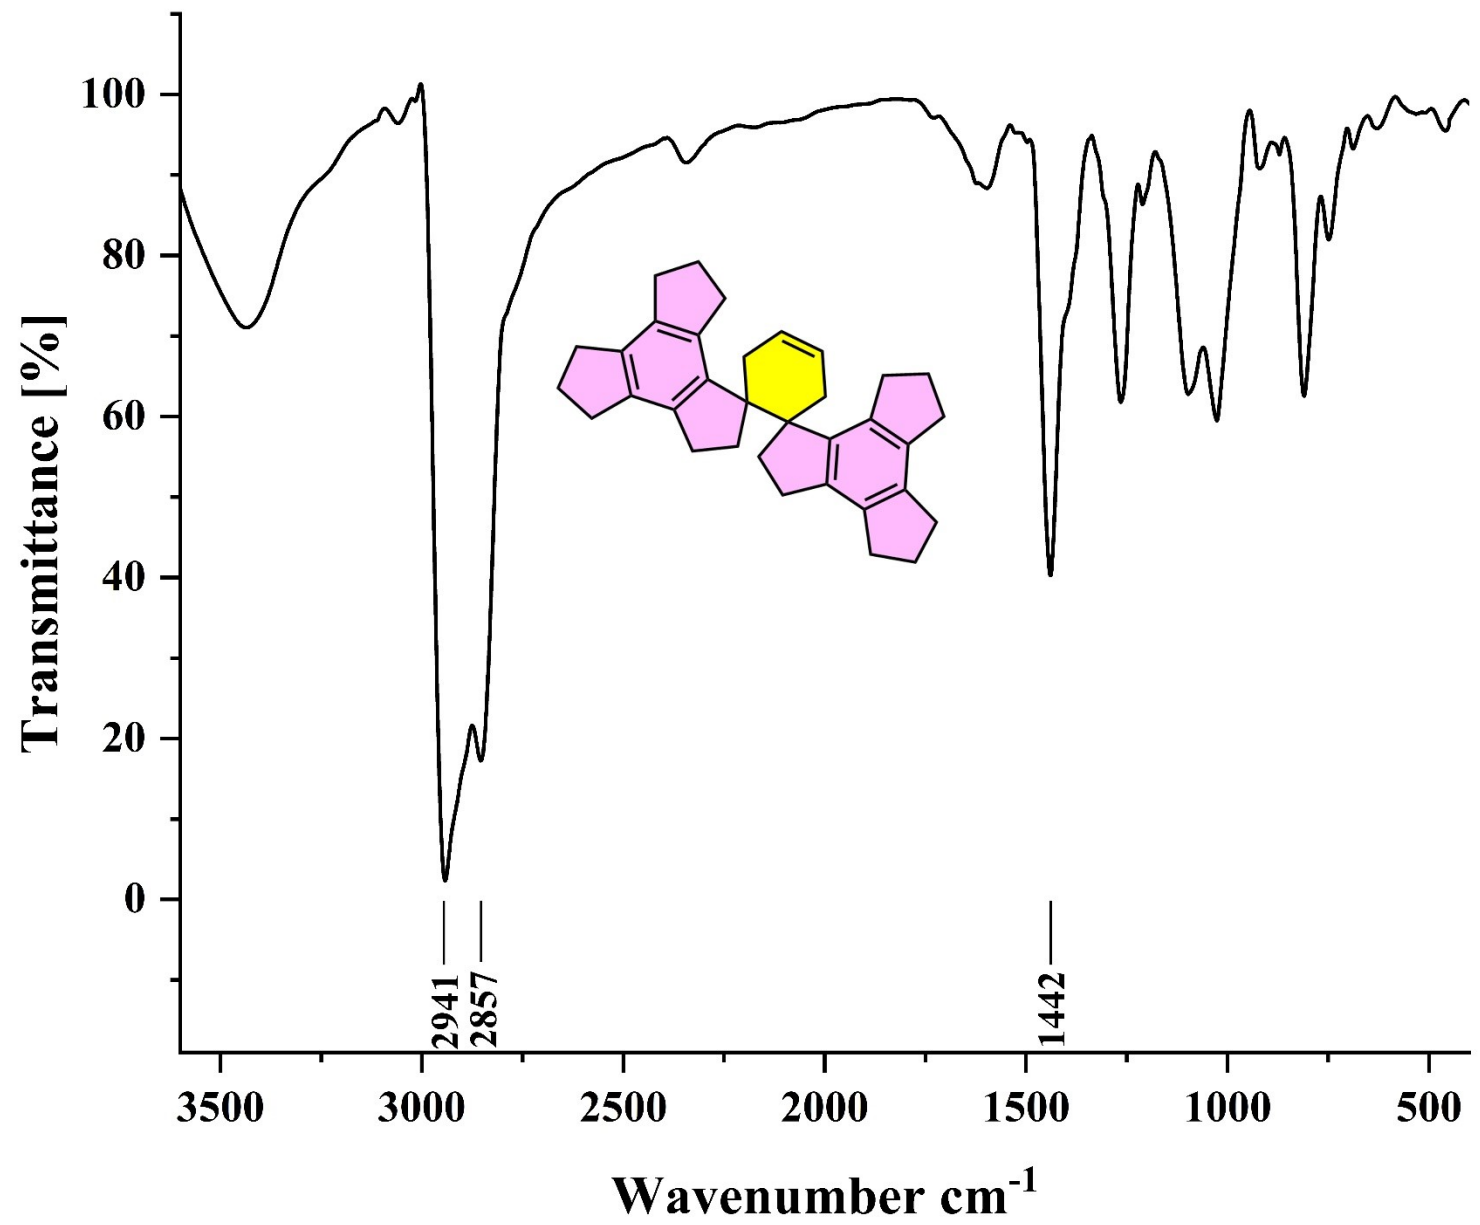

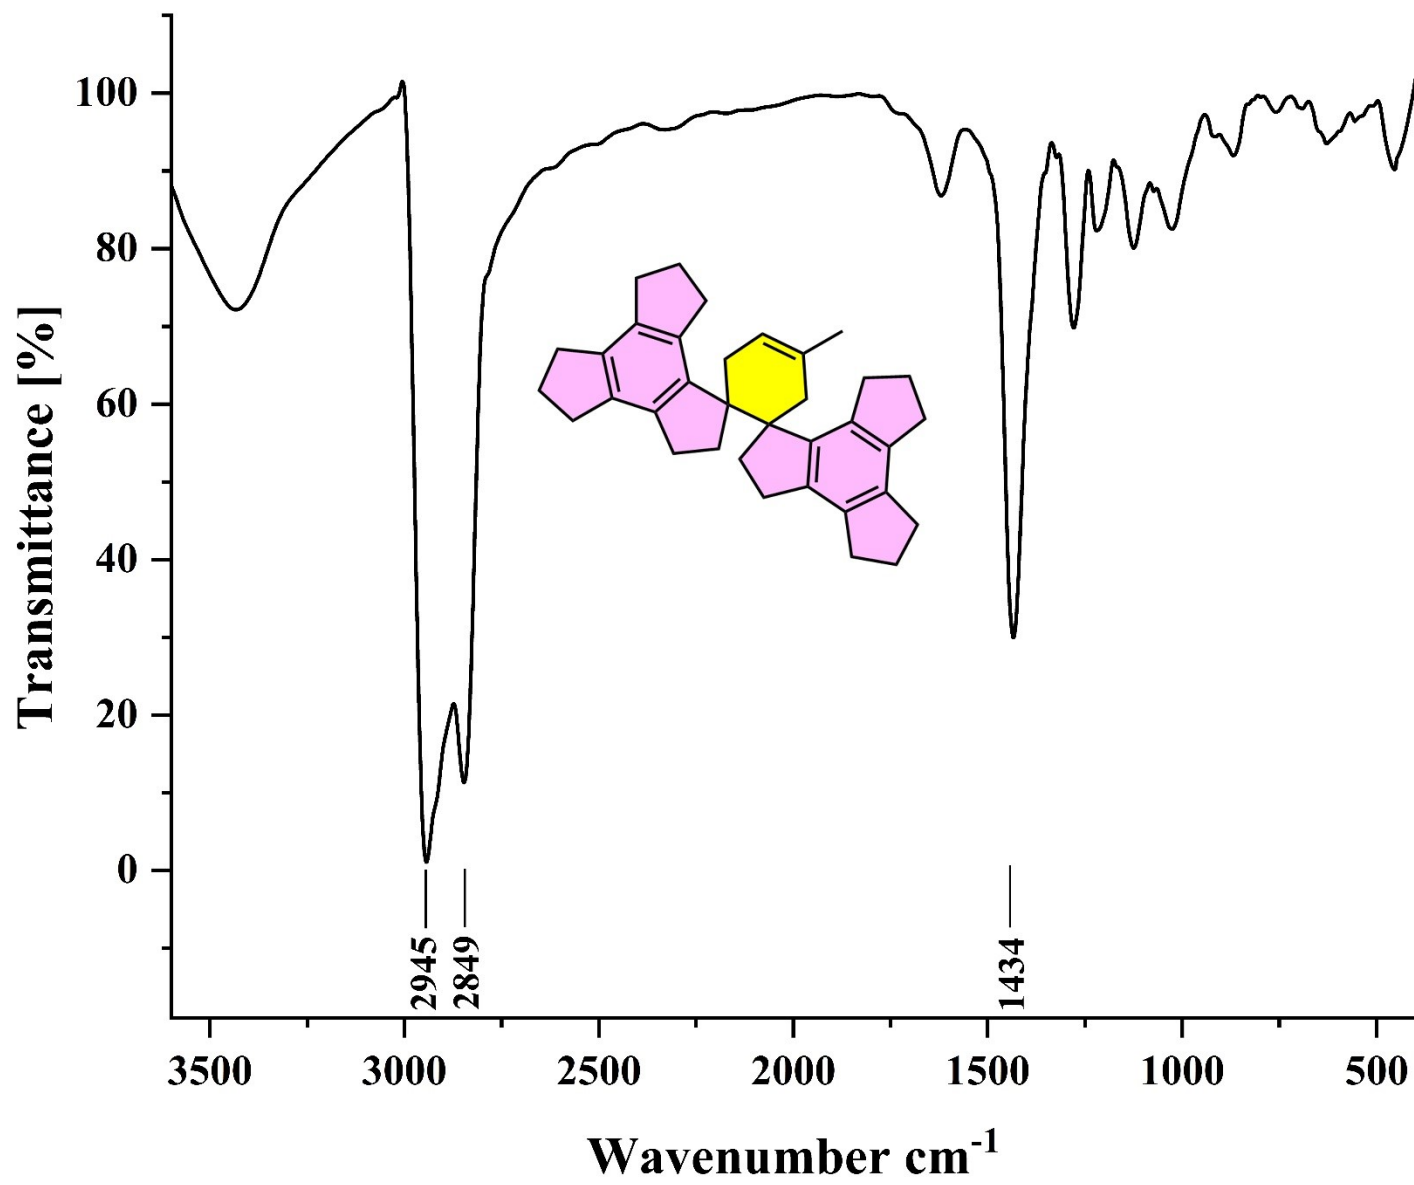

## Optimized Atomic Coordinates of Compounds in Angstrom (Å) using DFT calculations

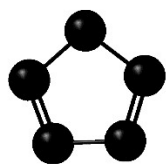

### D<sub>1</sub> C<sub>5</sub>H<sub>6</sub>

|   |                 |                 |                 |
|---|-----------------|-----------------|-----------------|
| C | -0.734798000000 | -0.987737000000 | 0.000012000000  |
| C | 0.734809000000  | -0.987729000000 | 0.000012000000  |
| C | -1.175859000000 | 0.280783000000  | -0.000027000000 |
| C | 1.175857000000  | 0.280797000000  | -0.000027000000 |
| C | -0.000008000000 | 1.214139000000  | 0.000035000000  |
| H | -1.350101000000 | -1.877561000000 | 0.000017000000  |
| H | 1.350122000000  | -1.877544000000 | 0.000017000000  |
| H | -2.206779000000 | 0.606219000000  | -0.000040000000 |
| H | 2.206771000000  | 0.606245000000  | -0.000040000000 |
| H | -0.000011000000 | 1.870590000000  | 0.878468000000  |
| H | -0.000011000000 | 1.870533000000  | -0.878446000000 |

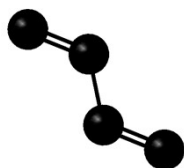

### D<sub>2</sub> C<sub>4</sub>H<sub>6</sub>

|   |                 |                 |                |
|---|-----------------|-----------------|----------------|
| C | -0.328641000000 | 0.652037000000  | 0.000000000000 |
| C | 0.328641000000  | -0.652037000000 | 0.000000000000 |
| C | 0.328641000000  | 1.811865000000  | 0.000000000000 |
| C | -0.328641000000 | -1.811865000000 | 0.000000000000 |
| H | -1.416076000000 | 0.645607000000  | 0.000000000000 |
| H | 1.416076000000  | -0.645607000000 | 0.000000000000 |
| H | -0.192325000000 | 2.761054000000  | 0.000000000000 |
| H | 1.413499000000  | 1.840834000000  | 0.000000000000 |
| H | 0.192325000000  | -2.761054000000 | 0.000000000000 |



|   |                 |                 |                |
|---|-----------------|-----------------|----------------|
| H | -1.413499000000 | -1.840834000000 | 0.000000000000 |
|---|-----------------|-----------------|----------------|

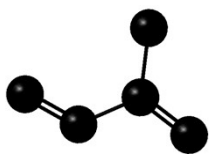

**D<sub>3</sub> C<sub>5</sub>H<sub>8</sub>**

|   |                 |                 |                 |
|---|-----------------|-----------------|-----------------|
| C | 0.505402000000  | -0.107646000000 | -0.000032000000 |
| C | -0.865234000000 | -0.640579000000 | -0.000038000000 |
| C | 1.532114000000  | -0.964641000000 | 0.000025000000  |
| C | 0.748411000000  | 1.385098000000  | -0.000009000000 |
| C | -2.001536000000 | 0.057385000000  | 0.000023000000  |
| H | -0.927078000000 | -1.726486000000 | -0.000075000000 |
| H | 2.559575000000  | -0.617225000000 | 0.000022000000  |
| H | 1.370308000000  | -2.036706000000 | 0.000081000000  |
| H | -0.174300000000 | 1.961520000000  | -0.001235000000 |
| H | 1.320273000000  | 1.676093000000  | 0.883113000000  |
| H | 1.322409000000  | 1.675765000000  | -0.881845000000 |
| H | -2.958073000000 | -0.450636000000 | 0.000021000000  |
| H | -2.028061000000 | 1.139973000000  | 0.000096000000  |

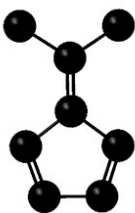

**D<sub>4</sub> C<sub>8</sub>H<sub>10</sub>**

|   |                 |                 |                 |
|---|-----------------|-----------------|-----------------|
| C | -0.000024000000 | -0.732879000000 | -2.246106000000 |
| C | 0.000024000000  | 0.732879000000  | -2.246106000000 |
| C | 0.000000000000  | -1.172334000000 | -0.969074000000 |
| C | 0.000000000000  | 1.172334000000  | -0.969074000000 |

|   |                 |                 |                 |
|---|-----------------|-----------------|-----------------|
| C | 0.000000000000  | 0.000000000000  | -0.079190000000 |
| H | -0.000126000000 | -1.350458000000 | -3.133637000000 |
| H | 0.000126000000  | 1.350458000000  | -3.133637000000 |
| H | -0.000149000000 | -2.203766000000 | -0.651567000000 |
| H | 0.000149000000  | 2.203766000000  | -0.651567000000 |
| C | -0.000222000000 | 1.258430000000  | 2.088702000000  |
| C | 0.000000000000  | 0.000000000000  | 1.271390000000  |
| H | -0.001091000000 | 2.161193000000  | 1.483253000000  |
| H | 0.878115000000  | 1.276793000000  | 2.741621000000  |
| C | 0.000222000000  | -1.258430000000 | 2.088702000000  |
| H | -0.878115000000 | -1.276793000000 | 2.741621000000  |
| H | 0.001091000000  | -2.161193000000 | 1.483253000000  |
| H | 0.877849000000  | -1.275797000000 | 2.742600000000  |
| H | -0.877849000000 | 1.275797000000  | 2.742600000000  |

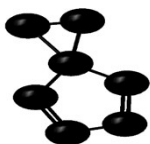

**D<sub>5</sub> C<sub>7</sub>H<sub>8</sub>**

|   |                 |                 |                 |
|---|-----------------|-----------------|-----------------|
| C | -1.736932000000 | -0.733279000000 | 0.000034000000  |
| C | -1.736957000000 | 0.733244000000  | 0.000211000000  |
| C | -0.462526000000 | -1.172466000000 | -0.000564000000 |
| C | -0.462569000000 | 1.172479000000  | -0.000299000000 |
| C | 0.433245000000  | 0.000024000000  | -0.000797000000 |
| H | -2.625068000000 | -1.350138000000 | 0.000798000000  |
| H | -2.625113000000 | 1.350075000000  | 0.000660000000  |
| H | -0.118381000000 | -2.198107000000 | -0.000749000000 |
| H | -0.118470000000 | 2.198135000000  | -0.000478000000 |
| C | 1.766040000000  | 0.000226000000  | -0.740929000000 |
| H | 2.024756000000  | -0.913656000000 | -1.258483000000 |

|   |                |                 |                 |
|---|----------------|-----------------|-----------------|
| C | 1.765073000000 | -0.000231000000 | 0.741882000000  |
| H | 2.022788000000 | 0.913764000000  | 1.259688000000  |
| H | 2.022609000000 | -0.914517000000 | 1.259245000000  |
| H | 2.024641000000 | 0.914461000000  | -1.257906000000 |

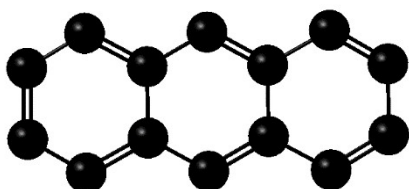

**D<sub>6</sub> C<sub>14</sub>H<sub>10</sub>**

|   |                 |                 |                 |
|---|-----------------|-----------------|-----------------|
| C | 3.645678000000  | -0.713831000000 | 0.000013000000  |
| C | 2.472522000000  | -1.403838000000 | -0.000039000000 |
| C | 1.217274000000  | -0.717130000000 | -0.000037000000 |
| C | 1.217274000000  | 0.717129000000  | -0.000013000000 |
| C | 2.472522000000  | 1.403838000000  | 0.000024000000  |
| C | 3.645679000000  | 0.713831000000  | 0.000046000000  |
| C | 0.000001000000  | -1.398991000000 | -0.000025000000 |
| C | 0.000001000000  | 1.398991000000  | -0.000012000000 |
| C | -1.217274000000 | 0.717130000000  | -0.000021000000 |
| C | -1.217274000000 | -0.717129000000 | -0.000003000000 |
| C | -2.472521000000 | -1.403838000000 | 0.000037000000  |
| H | -2.468009000000 | -2.488574000000 | 0.000085000000  |
| C | -3.645679000000 | -0.713830000000 | 0.000040000000  |
| C | -3.645679000000 | 0.713830000000  | 0.000000000000  |
| C | -2.472521000000 | 1.403838000000  | -0.000030000000 |
| H | -0.000004000000 | -2.484936000000 | -0.000024000000 |
| H | 4.590233000000  | -1.244646000000 | 0.000031000000  |
| H | 2.468008000000  | -2.488574000000 | -0.000076000000 |
| H | 2.468005000000  | 2.488574000000  | 0.000034000000  |

|   |                 |                 |                 |
|---|-----------------|-----------------|-----------------|
| H | 4.590230000000  | 1.244651000000  | 0.000084000000  |
| H | -0.000004000000 | 2.484936000000  | -0.000017000000 |
| H | -4.590230000000 | -1.244651000000 | 0.000055000000  |
| H | -4.590231000000 | 1.244650000000  | 0.000010000000  |
| H | -2.468009000000 | 2.488574000000  | -0.000069000000 |

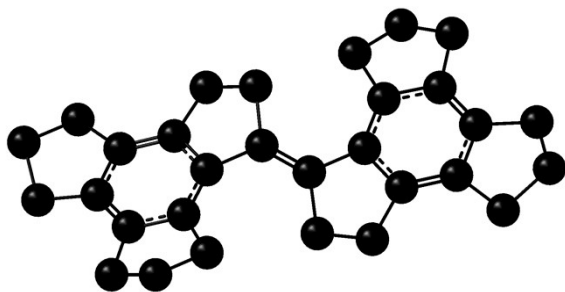

**Bitrindanylidine 7 C<sub>30</sub>H<sub>32</sub>**

|   |                 |                 |                 |
|---|-----------------|-----------------|-----------------|
| C | -4.733312000000 | -0.085079000000 | -0.298577000000 |
| C | -4.061045000000 | -1.059157000000 | 0.420424000000  |
| C | -2.666293000000 | -1.000654000000 | 0.567500000000  |
| C | -1.955049000000 | 0.048545000000  | -0.013468000000 |
| C | -2.654603000000 | 1.066911000000  | -0.692770000000 |
| C | -4.024875000000 | 0.991522000000  | -0.851357000000 |
| C | -0.522545000000 | 0.404015000000  | 0.027959000000  |
| C | -0.454489000000 | 1.895843000000  | -0.249328000000 |
| C | -1.702722000000 | 2.154771000000  | -1.125733000000 |
| C | -4.621050000000 | -2.230133000000 | 1.193620000000  |
| C | -3.501302000000 | -2.514400000000 | 2.214455000000  |
| C | -2.204554000000 | -2.112704000000 | 1.483797000000  |
| C | -4.970871000000 | 1.941195000000  | -1.548116000000 |
| C | -6.344396000000 | 1.548821000000  | -0.961585000000 |
| C | -6.209605000000 | 0.057934000000  | -0.582989000000 |
| C | 2.657486000000  | 0.982239000000  | 0.611976000000  |
| C | 1.960302000000  | -0.082153000000 | 0.039874000000  |

|   |                 |                 |                 |
|---|-----------------|-----------------|-----------------|
| C | 2.676391000000  | -1.115060000000 | -0.597242000000 |
| C | 4.048393000000  | -1.034482000000 | -0.739206000000 |
| C | 4.742421000000  | 0.055264000000  | -0.196822000000 |
| C | 4.054411000000  | 1.037392000000  | 0.496154000000  |
| C | 5.013535000000  | -2.014947000000 | -1.364406000000 |
| C | 6.295714000000  | -1.170959000000 | -1.532770000000 |
| C | 6.228375000000  | -0.106787000000 | -0.415812000000 |
| C | 0.527130000000  | -0.437048000000 | 0.052062000000  |
| C | 0.466580000000  | -1.935737000000 | -0.188205000000 |
| C | 1.738352000000  | -2.217759000000 | -1.022968000000 |
| C | 4.599681000000  | 2.223683000000  | 1.256482000000  |
| C | 3.453381000000  | 2.537950000000  | 2.238702000000  |
| C | 2.174861000000  | 2.119849000000  | 1.485111000000  |
| H | -0.542448000000 | 2.471693000000  | 0.677949000000  |
| H | 0.476562000000  | 2.175925000000  | -0.742111000000 |
| H | -1.450400000000 | 2.039590000000  | -2.185740000000 |
| H | -2.116812000000 | 3.156238000000  | -0.992571000000 |
| H | -4.768555000000 | -3.089718000000 | 0.528708000000  |
| H | -5.582692000000 | -2.012122000000 | 1.662830000000  |
| H | -3.640784000000 | -1.865643000000 | 3.083218000000  |
| H | -3.489625000000 | -3.548244000000 | 2.562278000000  |
| H | -1.825316000000 | -2.961557000000 | 0.904742000000  |
| H | -1.404336000000 | -1.795431000000 | 2.156371000000  |
| H | -4.943754000000 | 1.769355000000  | -2.630575000000 |
| H | -4.724552000000 | 2.992154000000  | -1.381512000000 |
| H | -6.520470000000 | 2.130194000000  | -0.052904000000 |
| H | -7.170638000000 | 1.740797000000  | -1.647082000000 |
| H | -6.839625000000 | -0.222637000000 | 0.263997000000  |
| H | -6.491646000000 | -0.586596000000 | -1.424023000000 |
| H | 5.185283000000  | -2.857498000000 | -0.683793000000 |

|   |                 |                 |                 |
|---|-----------------|-----------------|-----------------|
| H | 4.653660000000  | -2.429013000000 | -2.308709000000 |
| H | 6.263489000000  | -0.668153000000 | -2.502688000000 |
| H | 7.206905000000  | -1.769007000000 | -1.496302000000 |
| H | 6.704052000000  | -0.471546000000 | 0.502741000000  |
| H | 6.726189000000  | 0.825813000000  | -0.689828000000 |
| H | -0.450703000000 | -2.229164000000 | -0.698765000000 |
| H | 0.528728000000  | -2.487038000000 | 0.755896000000  |
| H | 1.514827000000  | -2.134643000000 | -2.092527000000 |
| H | 2.150797000000  | -3.213532000000 | -0.848339000000 |
| H | 4.771092000000  | 3.066182000000  | 0.575423000000  |
| H | 5.546251000000  | 2.010800000000  | 1.757753000000  |
| H | 3.567355000000  | 1.912592000000  | 3.128076000000  |
| H | 3.435723000000  | 3.580784000000  | 2.558230000000  |
| H | 1.813083000000  | 2.953516000000  | 0.873697000000  |
| H | 1.356552000000  | 1.822651000000  | 2.145000000000  |

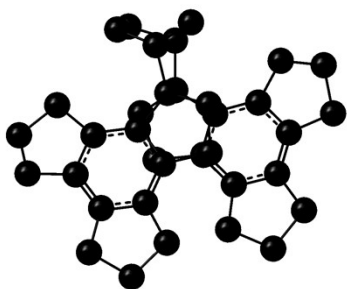

**Butterflyene adducts 8 C<sub>35</sub>H<sub>38</sub>**

|   |                |                 |                 |
|---|----------------|-----------------|-----------------|
| C | 3.416552000000 | 1.644578000000  | 0.492350000000  |
| C | 3.795715000000 | 0.474250000000  | -0.141176000000 |
| C | 2.936849000000 | -0.639215000000 | -0.171539000000 |
| C | 1.686428000000 | -0.566889000000 | 0.447774000000  |
| C | 1.355541000000 | 0.597692000000  | 1.165970000000  |
| C | 2.194978000000 | 1.697274000000  | 1.167830000000  |

|   |                 |                 |                 |
|---|-----------------|-----------------|-----------------|
| C | 0.517078000000  | -1.555141000000 | 0.520421000000  |
| C | -0.155645000000 | -1.085641000000 | 1.836489000000  |
| C | 0.053003000000  | 0.433691000000  | 1.904627000000  |
| C | 5.093614000000  | 0.177593000000  | -0.853005000000 |
| C | 5.116726000000  | -1.360446000000 | -0.867245000000 |
| C | 3.632045000000  | -1.768303000000 | -0.916914000000 |
| C | 2.031346000000  | 3.029413000000  | 1.861050000000  |
| C | 3.073076000000  | 3.914958000000  | 1.142527000000  |
| C | 4.173339000000  | 2.940618000000  | 0.666813000000  |
| C | -2.887058000000 | -0.682874000000 | 0.083073000000  |
| C | -1.669975000000 | -0.566543000000 | -0.604219000000 |
| C | -1.392327000000 | 0.655755000000  | -1.250736000000 |
| C | -2.259911000000 | 1.730207000000  | -1.180383000000 |
| C | -3.463583000000 | 1.609768000000  | -0.488066000000 |
| C | -3.776321000000 | 0.408578000000  | 0.122544000000  |
| C | -2.133972000000 | 3.105226000000  | -1.792990000000 |
| C | -3.192333000000 | 3.920282000000  | -1.016967000000 |
| C | -4.258551000000 | 2.890487000000  | -0.581456000000 |
| C | -0.457916000000 | -1.503242000000 | -0.762403000000 |
| C | 0.227257000000  | -0.873312000000 | -2.013129000000 |
| C | -0.078899000000 | 0.623978000000  | -1.979263000000 |
| C | -5.043533000000 | 0.063048000000  | 0.864333000000  |
| C | -4.629647000000 | -1.177349000000 | 1.668937000000  |
| C | -3.535757000000 | -1.846495000000 | 0.818236000000  |
| C | 0.800348000000  | -3.514258000000 | -0.919396000000 |
| C | -0.664668000000 | -3.037805000000 | -1.055173000000 |
| C | -1.254711000000 | -3.777878000000 | 0.130424000000  |
| C | -0.329723000000 | -3.812143000000 | 1.090443000000  |
| C | 0.894211000000  | -3.080138000000 | 0.559107000000  |
| H | 0.386225000000  | -1.554602000000 | 2.665927000000  |

|   |                 |                 |                 |
|---|-----------------|-----------------|-----------------|
| H | -1.199782000000 | -1.373624000000 | 1.914951000000  |
| H | -0.761169000000 | 0.973013000000  | 1.409005000000  |
| H | 0.117020000000  | 0.802668000000  | 2.931656000000  |
| H | 5.961952000000  | 0.614753000000  | -0.355321000000 |
| H | 5.065903000000  | 0.577424000000  | -1.874095000000 |
| H | 5.553732000000  | -1.718407000000 | 0.068739000000  |
| H | 5.696977000000  | -1.776272000000 | -1.692005000000 |
| H | 3.296010000000  | -1.807416000000 | -1.960699000000 |
| H | 3.456048000000  | -2.752278000000 | -0.482857000000 |
| H | 2.268835000000  | 2.929803000000  | 2.927136000000  |
| H | 1.016241000000  | 3.426550000000  | 1.790930000000  |
| H | 3.458419000000  | 4.717255000000  | 1.772742000000  |
| H | 2.604208000000  | 4.372417000000  | 0.267274000000  |
| H | 4.669290000000  | 3.276065000000  | -0.246629000000 |
| H | 4.949218000000  | 2.820761000000  | 1.432673000000  |
| H | -2.375281000000 | 3.063722000000  | -2.862045000000 |
| H | -1.128722000000 | 3.523422000000  | -1.704237000000 |
| H | -3.608198000000 | 4.742932000000  | -1.599770000000 |
| H | -2.726319000000 | 4.344725000000  | -0.123807000000 |
| H | -4.751413000000 | 3.161708000000  | 0.354777000000  |
| H | -5.041630000000 | 2.790047000000  | -1.342473000000 |
| H | -0.242828000000 | -1.314034000000 | -2.898785000000 |
| H | 1.293460000000  | -1.067317000000 | -2.070419000000 |
| H | 0.690696000000  | 1.178959000000  | -1.431629000000 |
| H | -0.152437000000 | 1.059953000000  | -2.979098000000 |
| H | -5.839630000000 | -0.180344000000 | 0.149922000000  |
| H | -5.408237000000 | 0.880803000000  | 1.489879000000  |
| H | -5.461155000000 | -1.846782000000 | 1.893353000000  |
| H | -4.189511000000 | -0.855939000000 | 2.617518000000  |
| H | -2.850615000000 | -2.428957000000 | 1.427910000000  |



|   |                 |                 |                 |
|---|-----------------|-----------------|-----------------|
| H | -3.981502000000 | -2.533804000000 | 0.088218000000  |
| H | 1.490911000000  | -3.017248000000 | -1.593728000000 |
| H | 0.892745000000  | -4.595181000000 | -1.029694000000 |
| H | -1.158557000000 | -3.210047000000 | -2.011321000000 |
| H | -2.260785000000 | -4.168720000000 | 0.177710000000  |
| H | -0.438119000000 | -4.201917000000 | 2.094558000000  |
| H | 1.826525000000  | -3.272430000000 | 1.090405000000  |

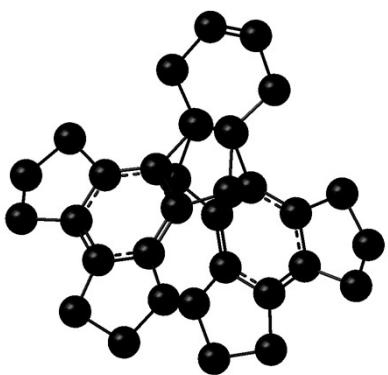

**Butadiene adducts 9 C<sub>34</sub>H<sub>38</sub>**

|   |                 |                 |                 |
|---|-----------------|-----------------|-----------------|
| C | -2.509692000000 | -1.770671000000 | 0.969627000000  |
| C | -3.049616000000 | -0.910333000000 | 0.028249000000  |
| C | -2.500014000000 | 0.366544000000  | -0.176911000000 |
| C | -1.400602000000 | 0.778513000000  | 0.582187000000  |
| C | -0.919378000000 | -0.074300000000 | 1.588749000000  |
| C | -1.442342000000 | -1.344147000000 | 1.760273000000  |
| C | -0.573299000000 | 2.071010000000  | 0.552150000000  |
| C | 0.025540000000  | 2.063075000000  | 1.990324000000  |
| C | 0.141153000000  | 0.590828000000  | 2.424325000000  |
| C | -4.253644000000 | -1.137893000000 | -0.853298000000 |
| C | -4.099863000000 | -0.045230000000 | -1.924945000000 |
| C | -3.335623000000 | 1.092642000000  | -1.221541000000 |
| C | -1.058497000000 | -2.412846000000 | 2.755944000000  |

|   |                 |                 |                 |
|---|-----------------|-----------------|-----------------|
| C | -1.716756000000 | -3.678255000000 | 2.163311000000  |
| C | -2.936193000000 | -3.164461000000 | 1.366436000000  |
| C | 2.499797000000  | 0.367959000000  | 0.176988000000  |
| C | 1.400165000000  | 0.779325000000  | -0.582134000000 |
| C | 0.919446000000  | -0.073762000000 | -1.588709000000 |
| C | 1.443190000000  | -1.343277000000 | -1.760300000000 |
| C | 2.510808000000  | -1.769181000000 | -0.969686000000 |
| C | 3.050185000000  | -0.908572000000 | -0.028247000000 |
| C | 1.059996000000  | -2.412164000000 | -2.756021000000 |
| C | 1.719056000000  | -3.677193000000 | -2.163473000000 |
| C | 2.938177000000  | -3.162683000000 | -1.366577000000 |
| C | 0.572072000000  | 2.071336000000  | -0.552083000000 |
| C | -0.026862000000 | 2.063015000000  | -1.990206000000 |
| C | -0.141557000000 | 0.590702000000  | -2.424210000000 |
| C | 4.254352000000  | -1.135460000000 | 0.853285000000  |
| C | 4.099863000000  | -0.043018000000 | 1.925047000000  |
| C | 3.334886000000  | 1.094438000000  | 1.221774000000  |
| C | 1.444634000000  | 3.324905000000  | -0.364302000000 |
| C | 0.643069000000  | 4.580426000000  | -0.165080000000 |
| C | -0.645922000000 | 4.580016000000  | 0.164868000000  |
| C | -1.446666000000 | 3.323988000000  | 0.364206000000  |
| H | 0.953047000000  | 2.626298000000  | 2.072617000000  |
| H | -0.695856000000 | 2.554346000000  | 2.649469000000  |
| H | -0.056422000000 | 0.465204000000  | 3.492645000000  |
| H | 1.123863000000  | 0.159445000000  | 2.224613000000  |
| H | -5.174021000000 | -0.993931000000 | -0.274311000000 |
| H | -4.291000000000 | -2.145425000000 | -1.273779000000 |
| H | -3.484939000000 | -0.432282000000 | -2.742945000000 |
| H | -5.050363000000 | 0.282084000000  | -2.348140000000 |
| H | -4.034601000000 | 1.771645000000  | -0.718322000000 |

|   |                 |                 |                 |
|---|-----------------|-----------------|-----------------|
| H | -2.759634000000 | 1.686445000000  | -1.929419000000 |
| H | -1.475818000000 | -2.177518000000 | 3.742689000000  |
| H | 0.022396000000  | -2.515471000000 | 2.875644000000  |
| H | -1.014570000000 | -4.147943000000 | 1.469502000000  |
| H | -1.983260000000 | -4.415756000000 | 2.921307000000  |
| H | -3.181070000000 | -3.799453000000 | 0.511976000000  |
| H | -3.829070000000 | -3.117436000000 | 2.001397000000  |
| H | 1.477152000000  | -2.176519000000 | -3.742761000000 |
| H | -0.020835000000 | -2.515461000000 | -2.875708000000 |
| H | 1.017174000000  | -4.147367000000 | -1.469687000000 |
| H | 1.986016000000  | -4.414479000000 | -2.921518000000 |
| H | 3.831023000000  | -3.115065000000 | -2.001536000000 |
| H | 3.183452000000  | -3.797572000000 | -0.512154000000 |
| H | -0.954748000000 | 2.625635000000  | -2.072410000000 |
| H | 0.694164000000  | 2.554769000000  | -2.649397000000 |
| H | 0.056032000000  | 0.465215000000  | -3.492543000000 |
| H | -1.123977000000 | 0.158688000000  | -2.224438000000 |
| H | 5.174645000000  | -0.990851000000 | 0.274323000000  |
| H | 4.292344000000  | -2.143012000000 | 1.273661000000  |
| H | 3.485184000000  | -0.430561000000 | 2.742999000000  |
| H | 5.050149000000  | 0.284861000000  | 2.348287000000  |
| H | 4.033431000000  | 1.773983000000  | 0.718685000000  |
| H | 2.758484000000  | 1.687743000000  | 1.929731000000  |
| H | 2.089248000000  | 3.431200000000  | -1.243409000000 |
| H | 2.130506000000  | 3.208365000000  | 0.479054000000  |
| H | 1.163474000000  | 5.526207000000  | -0.287483000000 |
| H | -1.166957000000 | 5.525464000000  | 0.287159000000  |
| H | -2.091389000000 | 3.429951000000  | 1.243272000000  |
| H | -2.132427000000 | 3.206895000000  | -0.479175000000 |

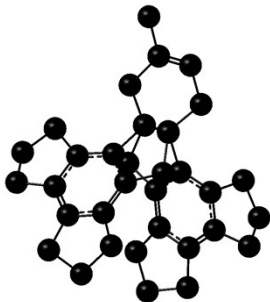

**Isoprene adduct 10 C<sub>35</sub>H<sub>40</sub>**

|   |                 |                 |                 |
|---|-----------------|-----------------|-----------------|
| C | -0.832611000000 | 3.037643000000  | 0.978256000000  |
| C | 0.149966000000  | 3.200205000000  | 0.015983000000  |
| C | 1.106758000000  | 2.196357000000  | -0.210288000000 |
| C | 1.073839000000  | 1.022748000000  | 0.548787000000  |
| C | 0.122637000000  | 0.911408000000  | 1.575955000000  |
| C | -0.838892000000 | 1.888006000000  | 1.768651000000  |
| C | 1.940878000000  | -0.242921000000 | 0.499215000000  |
| C | 1.731132000000  | -0.791498000000 | 1.941889000000  |
| C | 0.339497000000  | -0.325530000000 | 2.405808000000  |
| C | 0.390947000000  | 4.398231000000  | -0.870274000000 |
| C | 1.312818000000  | 3.830605000000  | -1.962895000000 |
| C | 2.077755000000  | 2.682853000000  | -1.276520000000 |
| C | -1.950408000000 | 1.951166000000  | 2.789213000000  |
| C | -2.871840000000 | 3.050813000000  | 2.217019000000  |
| C | -1.941040000000 | 3.973488000000  | 1.399516000000  |
| C | -0.823063000000 | -2.421293000000 | 0.182062000000  |
| C | -0.036297000000 | -1.564146000000 | -0.593372000000 |
| C | -0.659968000000 | -0.793272000000 | -1.587898000000 |
| C | -2.036266000000 | -0.791631000000 | -1.733747000000 |
| C | -2.823305000000 | -1.614431000000 | -0.927513000000 |
| C | -2.216911000000 | -2.440686000000 | 0.003787000000  |
| C | -2.895652000000 | -0.031561000000 | -2.715956000000 |
| C | -4.305639000000 | -0.156180000000 | -2.097763000000 |

|   |                 |                 |                 |
|---|-----------------|-----------------|-----------------|
| C | -4.281376000000 | -1.477589000000 | -1.298187000000 |
| C | 1.475316000000  | -1.296792000000 | -0.595547000000 |
| C | 1.666470000000  | -0.741062000000 | -2.038329000000 |
| C | 0.343598000000  | -0.066381000000 | -2.442192000000 |
| C | -2.870799000000 | -3.464687000000 | 0.899684000000  |
| C | -1.782418000000 | -3.737414000000 | 1.951590000000  |
| C | -0.452668000000 | -3.470188000000 | 1.221208000000  |
| C | 2.302089000000  | -2.582144000000 | -0.423547000000 |
| C | 3.773397000000  | -2.326642000000 | -0.253974000000 |
| C | 4.294730000000  | -1.143413000000 | 0.069506000000  |
| C | 3.429491000000  | 0.072483000000  | 0.280507000000  |
| C | 5.774263000000  | -0.924082000000 | 0.218470000000  |
| H | 1.891432000000  | -1.864886000000 | 2.019736000000  |
| H | 2.478037000000  | -0.317563000000 | 2.585370000000  |
| H | 0.322645000000  | -0.096087000000 | 3.475019000000  |
| H | -0.444296000000 | -1.062683000000 | 2.221069000000  |
| H | 0.895943000000  | 5.188733000000  | -0.301781000000 |
| H | -0.531090000000 | 4.826532000000  | -1.269883000000 |
| H | 0.698473000000  | 3.415424000000  | -2.767411000000 |
| H | 1.975386000000  | 4.578226000000  | -2.400825000000 |
| H | 2.986703000000  | 3.061250000000  | -0.793292000000 |
| H | 2.383507000000  | 1.920972000000  | -1.991642000000 |
| H | -1.549010000000 | 2.243725000000  | 3.767227000000  |
| H | -2.463311000000 | 0.995746000000  | 2.920376000000  |
| H | -3.593407000000 | 2.587476000000  | 1.539019000000  |
| H | -3.430123000000 | 3.583682000000  | 2.987655000000  |
| H | -1.536056000000 | 4.777585000000  | 2.025666000000  |
| H | -2.449039000000 | 4.446397000000  | 0.555954000000  |
| H | -2.854810000000 | -0.509908000000 | -3.702246000000 |
| H | -2.580766000000 | 1.006461000000  | -2.844550000000 |

|   |                 |                 |                 |
|---|-----------------|-----------------|-----------------|
| H | -4.459780000000 | 0.673692000000  | -1.403093000000 |
| H | -5.102427000000 | -0.123112000000 | -2.841766000000 |
| H | -4.590099000000 | -2.322229000000 | -1.925821000000 |
| H | -4.946153000000 | -1.459830000000 | -0.431555000000 |
| H | 2.541969000000  | -0.103122000000 | -2.141248000000 |
| H | 1.825873000000  | -1.596848000000 | -2.700482000000 |
| H | 0.129140000000  | -0.195337000000 | -3.506846000000 |
| H | 0.327523000000  | 1.005728000000  | -2.236391000000 |
| H | -3.099620000000 | -4.371579000000 | 0.326711000000  |
| H | -3.808431000000 | -3.113615000000 | 1.336612000000  |
| H | -1.888454000000 | -3.017845000000 | 2.768935000000  |
| H | -1.836001000000 | -4.739221000000 | 2.379666000000  |
| H | -0.104784000000 | -4.377144000000 | 0.712020000000  |
| H | 0.330990000000  | -3.166102000000 | 1.913059000000  |
| H | 1.944317000000  | -3.170719000000 | 0.425560000000  |
| H | 2.135191000000  | -3.217306000000 | -1.300231000000 |
| H | 4.439627000000  | -3.174770000000 | -0.395096000000 |
| H | 3.794995000000  | 0.631654000000  | 1.150241000000  |
| H | 3.575180000000  | 0.746291000000  | -0.569125000000 |
| H | 6.339385000000  | -1.829765000000 | -0.005788000000 |
| H | 6.115335000000  | -0.128766000000 | -0.452539000000 |
| H | 6.017437000000  | -0.605888000000 | 1.237093000000  |

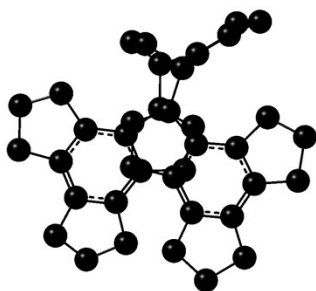

**6,6-dimethylfulvene adduct C<sub>38</sub>H<sub>42</sub>**

|   |                 |                 |                 |
|---|-----------------|-----------------|-----------------|
| C | -3.852200000000 | 0.380108000000  | 0.546593000000  |
| C | -3.772415000000 | -0.844851000000 | -0.095355000000 |
| C | -2.565852000000 | -1.564911000000 | -0.123398000000 |
| C | -1.417858000000 | -1.021791000000 | 0.460178000000  |
| C | -1.541208000000 | 0.175951000000  | 1.192396000000  |
| C | -2.735507000000 | 0.874195000000  | 1.223111000000  |
| C | 0.059844000000  | -1.410949000000 | 0.399590000000  |
| C | 0.582966000000  | -0.727965000000 | 1.694453000000  |
| C | -0.260904000000 | 0.537088000000  | 1.897744000000  |
| C | -4.864399000000 | -1.588312000000 | -0.824864000000 |
| C | -4.336026000000 | -3.033017000000 | -0.834640000000 |
| C | -2.798254000000 | -2.903508000000 | -0.800192000000 |
| C | -3.054315000000 | 2.194028000000  | 1.883700000000  |
| C | -4.598992000000 | 2.217024000000  | 1.878214000000  |
| C | -5.016218000000 | 1.333441000000  | 0.681151000000  |
| C | 2.509077000000  | 1.035699000000  | -0.177284000000 |
| C | 1.339443000000  | 0.549263000000  | -0.764865000000 |
| C | 0.404971000000  | 1.470609000000  | -1.271967000000 |
| C | 0.569954000000  | 2.830574000000  | -1.074499000000 |
| C | 1.701330000000  | 3.309089000000  | -0.409869000000 |
| C | 2.680042000000  | 2.418352000000  | -0.000644000000 |
| C | -0.312100000000 | 3.976727000000  | -1.509837000000 |
| C | 0.187209000000  | 5.140671000000  | -0.625933000000 |
| C | 1.669108000000  | 4.817673000000  | -0.332494000000 |
| C | 0.793351000000  | -0.868253000000 | -0.932369000000 |
| C | -0.172652000000 | -0.655819000000 | -2.130319000000 |
| C | -0.706560000000 | 0.779740000000  | -2.016003000000 |
| C | 4.005212000000  | 2.717794000000  | 0.658119000000  |
| C | 4.805854000000  | 1.429678000000  | 0.392542000000  |
| C | 3.745807000000  | 0.311613000000  | 0.317701000000  |

|   |                 |                 |                 |
|---|-----------------|-----------------|-----------------|
| H | 0.389699000000  | -1.420760000000 | 2.521114000000  |
| H | 1.650924000000  | -0.537989000000 | 1.671426000000  |
| H | 0.207288000000  | 1.423876000000  | 1.459328000000  |
| H | -0.435668000000 | 0.749733000000  | 2.956270000000  |
| H | -4.967461000000 | -1.198815000000 | -1.844615000000 |
| H | -5.840037000000 | -1.495453000000 | -0.342624000000 |
| H | -4.669831000000 | -3.537181000000 | 0.075815000000  |
| H | -4.690356000000 | -3.614309000000 | -1.686757000000 |
| H | -2.374555000000 | -2.927515000000 | -1.810195000000 |
| H | -2.345493000000 | -3.722741000000 | -0.242590000000 |
| H | -2.641841000000 | 3.016994000000  | 1.286946000000  |
| H | -2.633475000000 | 2.284029000000  | 2.887670000000  |
| H | -4.962129000000 | 1.756045000000  | 2.800315000000  |
| H | -5.010335000000 | 3.225731000000  | 1.825432000000  |
| H | -5.971028000000 | 0.827852000000  | 0.842060000000  |
| H | -5.116890000000 | 1.931196000000  | -0.232559000000 |
| H | -0.150558000000 | 4.193378000000  | -2.572812000000 |
| H | -1.376917000000 | 3.769609000000  | -1.379785000000 |
| H | -0.368326000000 | 5.132305000000  | 0.315799000000  |
| H | 0.047659000000  | 6.118539000000  | -1.088212000000 |
| H | 2.323565000000  | 5.246226000000  | -1.101252000000 |
| H | 2.004316000000  | 5.206541000000  | 0.631464000000  |
| H | -0.962765000000 | -1.399260000000 | -2.179161000000 |
| H | 0.422896000000  | -0.741450000000 | -3.046445000000 |
| H | -1.650421000000 | 0.821465000000  | -1.462701000000 |
| H | -0.880127000000 | 1.235589000000  | -2.994795000000 |
| H | 3.864244000000  | 2.877924000000  | 1.733916000000  |
| H | 4.488821000000  | 3.611128000000  | 0.256735000000  |
| H | 5.302904000000  | 1.515892000000  | -0.577286000000 |
| H | 5.571252000000  | 1.236605000000  | 1.145487000000  |



|   |                 |                 |                 |
|---|-----------------|-----------------|-----------------|
| H | 3.585466000000  | -0.137652000000 | 1.304476000000  |
| H | 4.046855000000  | -0.494877000000 | -0.346884000000 |
| C | 0.227986000000  | -3.657734000000 | -0.860930000000 |
| C | 0.998143000000  | -3.162364000000 | -1.830069000000 |
| C | 0.541358000000  | -2.903552000000 | 0.426791000000  |
| C | 1.821789000000  | -2.034834000000 | -1.218039000000 |
| C | 2.028404000000  | -2.670144000000 | 0.151381000000  |
| H | -0.494232000000 | -4.454966000000 | -0.955465000000 |
| H | 1.003574000000  | -3.443846000000 | -2.874982000000 |
| H | 0.265409000000  | -3.416242000000 | 1.346315000000  |
| H | 2.692746000000  | -1.714811000000 | -1.787096000000 |
| C | 4.508453000000  | -2.942750000000 | 0.271269000000  |
| C | 3.110317000000  | -3.059314000000 | 0.819048000000  |
| H | 4.527869000000  | -2.586930000000 | -0.758399000000 |
| H | 4.989472000000  | -3.926190000000 | 0.293066000000  |
| C | 3.036093000000  | -3.703443000000 | 2.179127000000  |
| H | 3.663840000000  | -3.153387000000 | 2.888616000000  |
| H | 2.022783000000  | -3.729172000000 | 2.576952000000  |
| H | 3.420534000000  | -4.728277000000 | 2.144573000000  |
| H | 5.122829000000  | -2.273659000000 | 0.883617000000  |

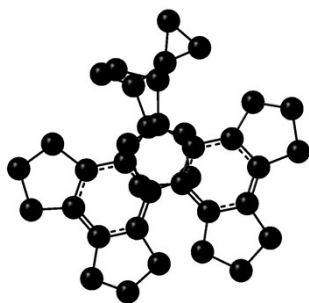

**Spiro[2.4]hepta-4,6-diene adduct C<sub>37</sub>H<sub>40</sub>**

|   |                 |                |                |
|---|-----------------|----------------|----------------|
| C | -3.406002000000 | 1.493178000000 | 0.457881000000 |
|---|-----------------|----------------|----------------|

|   |                 |                 |                 |
|---|-----------------|-----------------|-----------------|
| C | -3.719830000000 | 0.281329000000  | -0.134963000000 |
| C | -2.821008000000 | -0.798374000000 | -0.086664000000 |
| C | -1.573858000000 | -0.638850000000 | 0.525121000000  |
| C | -1.316108000000 | 0.564486000000  | 1.210411000000  |
| C | -2.208941000000 | 1.620488000000  | 1.164314000000  |
| C | -0.308826000000 | -1.500330000000 | 0.545346000000  |
| C | 0.378947000000  | -0.965224000000 | 1.833942000000  |
| C | -0.013526000000 | 0.513384000000  | 1.960845000000  |
| C | -4.977322000000 | -0.092492000000 | -0.880664000000 |
| C | -4.961395000000 | -1.628655000000 | -0.810616000000 |
| C | -3.469309000000 | -2.013408000000 | -0.725724000000 |
| C | -2.089128000000 | 3.000842000000  | 1.764431000000  |
| C | -3.536928000000 | 3.534970000000  | 1.690512000000  |
| C | -4.189898000000 | 2.783424000000  | 0.508647000000  |
| C | 2.838833000000  | 0.058563000000  | -0.058948000000 |
| C | 1.575514000000  | -0.090511000000 | -0.636208000000 |
| C | 0.978572000000  | 1.041296000000  | -1.226100000000 |
| C | 1.549571000000  | 2.295717000000  | -1.110557000000 |
| C | 2.775246000000  | 2.450082000000  | -0.460476000000 |
| C | 3.432426000000  | 1.330954000000  | 0.019434000000  |
| C | 1.062673000000  | 3.622120000000  | -1.644089000000 |
| C | 1.900299000000  | 4.637517000000  | -0.835996000000 |
| C | 3.211285000000  | 3.896285000000  | -0.491367000000 |
| C | 0.619991000000  | -1.285463000000 | -0.756082000000 |
| C | -0.193168000000 | -0.849435000000 | -2.011382000000 |
| C | -0.268959000000 | 0.682318000000  | -1.983482000000 |
| C | 4.799394000000  | 1.252016000000  | 0.655616000000  |
| C | 5.155665000000  | -0.233858000000 | 0.477813000000  |
| C | 3.797367000000  | -0.957824000000 | 0.531201000000  |
| H | -0.032445000000 | -1.522057000000 | 2.683091000000  |

|   |                 |                 |                 |
|---|-----------------|-----------------|-----------------|
| H | 1.453807000000  | -1.113174000000 | 1.832188000000  |
| H | 0.734409000000  | 1.178167000000  | 1.517100000000  |
| H | -0.141913000000 | 0.816986000000  | 3.003771000000  |
| H | -4.915908000000 | 0.255425000000  | -1.918724000000 |
| H | -5.878416000000 | 0.344764000000  | -0.444997000000 |
| H | -5.462511000000 | -1.945716000000 | 0.107533000000  |
| H | -5.471054000000 | -2.102811000000 | -1.650286000000 |
| H | -3.057143000000 | -2.216608000000 | -1.720166000000 |
| H | -3.325605000000 | -2.912141000000 | -0.126787000000 |
| H | -1.408216000000 | 3.611201000000  | 1.158325000000  |
| H | -1.692466000000 | 2.993434000000  | 2.782182000000  |
| H | -4.059989000000 | 3.265817000000  | 2.611707000000  |
| H | -3.586548000000 | 4.619225000000  | 1.583682000000  |
| H | -5.262684000000 | 2.630720000000  | 0.646557000000  |
| H | -4.060140000000 | 3.336515000000  | -0.429204000000 |
| H | 1.279047000000  | 3.699265000000  | -2.716570000000 |
| H | -0.013634000000 | 3.763064000000  | -1.519925000000 |
| H | 1.372812000000  | 4.870763000000  | 0.092885000000  |
| H | 2.068010000000  | 5.573713000000  | -1.369624000000 |
| H | 3.963386000000  | 4.044111000000  | -1.275855000000 |
| H | 3.653388000000  | 4.233243000000  | 0.448716000000  |
| H | -1.171098000000 | -1.316413000000 | -2.067952000000 |
| H | 0.376702000000  | -1.160809000000 | -2.894291000000 |
| H | -1.171093000000 | 1.040183000000  | -1.477391000000 |
| H | -0.264322000000 | 1.114481000000  | -2.988206000000 |
| H | 4.739875000000  | 1.513866000000  | 1.719205000000  |
| H | 5.523765000000  | 1.926093000000  | 0.193331000000  |
| H | 5.600300000000  | -0.377894000000 | -0.510540000000 |
| H | 5.861329000000  | -0.601742000000 | 1.223969000000  |
| H | 3.535389000000  | -1.172131000000 | 1.573077000000  |

|   |                 |                 |                 |
|---|-----------------|-----------------|-----------------|
| H | 3.804084000000  | -1.904840000000 | -0.008152000000 |
| C | -0.860882000000 | -3.696127000000 | -0.692925000000 |
| C | 0.101670000000  | -3.533013000000 | -1.599823000000 |
| C | -0.383785000000 | -3.068503000000 | 0.613753000000  |
| C | 1.221936000000  | -2.738757000000 | -0.930639000000 |
| C | 1.106981000000  | -3.400642000000 | 0.455690000000  |
| H | -1.810295000000 | -4.186450000000 | -0.846548000000 |
| H | 0.075135000000  | -3.819977000000 | -2.642874000000 |
| H | -0.867868000000 | -3.429637000000 | 1.523189000000  |
| H | 2.189606000000  | -2.763153000000 | -1.431899000000 |
| C | 1.613772000000  | -4.772963000000 | 0.754216000000  |
| C | 2.074723000000  | -3.595613000000 | 1.577868000000  |
| H | 3.103876000000  | -3.290073000000 | 1.464562000000  |
| H | 1.687240000000  | -3.501549000000 | 2.586010000000  |
| H | 2.329623000000  | -5.206801000000 | 0.065922000000  |
| H | 0.925623000000  | -5.480618000000 | 1.200974000000  |

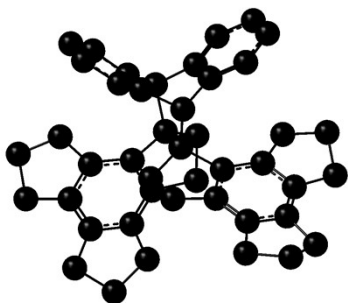

**Anthracene adduct C<sub>44</sub>H<sub>42</sub>**

|   |                |                 |                 |
|---|----------------|-----------------|-----------------|
| C | 3.870676000000 | -2.095730000000 | 0.857121000000  |
| C | 3.775260000000 | -1.402591000000 | -0.333240000000 |
| C | 2.644732000000 | -0.614167000000 | -0.648433000000 |
| C | 1.569611000000 | -0.546457000000 | 0.260322000000  |
| C | 1.726625000000 | -1.222224000000 | 1.494227000000  |
| C | 2.840556000000 | -1.985039000000 | 1.786450000000  |

|   |                 |                 |                 |
|---|-----------------|-----------------|-----------------|
| C | 0.260556000000  | 0.310094000000  | 0.369129000000  |
| C | -0.478222000000 | -0.424904000000 | 1.518809000000  |
| C | 0.606685000000  | -0.936394000000 | 2.453979000000  |
| C | 4.819970000000  | -1.336725000000 | -1.419831000000 |
| C | 4.438297000000  | -0.044389000000 | -2.149534000000 |
| C | 2.910946000000  | 0.001738000000  | -2.021278000000 |
| C | 3.159588000000  | -2.775771000000 | 3.033700000000  |
| C | 4.679346000000  | -3.021864000000 | 2.901636000000  |
| C | 4.967916000000  | -2.989259000000 | 1.383950000000  |
| C | -3.204632000000 | -0.185909000000 | -0.033425000000 |
| C | -2.008751000000 | -0.296181000000 | -0.752082000000 |
| C | -1.758482000000 | -1.500502000000 | -1.440935000000 |
| C | -2.616289000000 | -2.581375000000 | -1.347978000000 |
| C | -3.769445000000 | -2.487470000000 | -0.570360000000 |
| C | -4.066077000000 | -1.293639000000 | 0.062475000000  |
| C | -2.523503000000 | -3.942345000000 | -1.996701000000 |
| C | -3.503258000000 | -4.786747000000 | -1.151726000000 |
| C | -4.546469000000 | -3.781831000000 | -0.613929000000 |
| C | -0.738487000000 | 0.588371000000  | -0.869844000000 |
| C | -0.229167000000 | 0.073870000000  | -2.235714000000 |
| C | -0.476246000000 | -1.431544000000 | -2.225175000000 |
| C | -5.247370000000 | -1.001197000000 | 0.953725000000  |
| C | -5.256691000000 | 0.534958000000  | 1.019764000000  |
| C | -3.804884000000 | 0.975598000000  | 0.733596000000  |
| H | -1.221160000000 | 0.212162000000  | 2.000092000000  |
| H | -0.995372000000 | -1.292772000000 | 1.108957000000  |
| H | 0.295421000000  | -1.816868000000 | 3.020260000000  |
| H | 0.918914000000  | -0.176979000000 | 3.182449000000  |
| H | 4.727241000000  | -2.201142000000 | -2.089427000000 |
| H | 5.838965000000  | -1.335393000000 | -1.027036000000 |

|   |                 |                 |                 |
|---|-----------------|-----------------|-----------------|
| H | 4.865395000000  | 0.813136000000  | -1.620445000000 |
| H | 4.774738000000  | -0.009564000000 | -3.186809000000 |
| H | 2.469640000000  | -0.639994000000 | -2.794608000000 |
| H | 2.526620000000  | 1.009620000000  | -2.153528000000 |
| H | 2.605024000000  | -3.721744000000 | 3.030151000000  |
| H | 2.896612000000  | -2.251093000000 | 3.954999000000  |
| H | 5.213988000000  | -2.197404000000 | 3.380255000000  |
| H | 5.002735000000  | -3.949012000000 | 3.376170000000  |
| H | 5.970901000000  | -2.624028000000 | 1.152689000000  |
| H | 4.878797000000  | -3.989971000000 | 0.945185000000  |
| H | -2.854765000000 | -3.883684000000 | -3.040521000000 |
| H | -1.509726000000 | -4.348478000000 | -2.000346000000 |
| H | -2.959584000000 | -5.217487000000 | -0.306990000000 |
| H | -3.952318000000 | -5.606754000000 | -1.713198000000 |
| H | -5.393478000000 | -3.686514000000 | -1.303987000000 |
| H | -4.952239000000 | -4.072653000000 | 0.357553000000  |
| H | 0.781242000000  | 0.368795000000  | -2.456375000000 |
| H | -0.872537000000 | 0.522932000000  | -3.001757000000 |
| H | 0.330600000000  | -1.966452000000 | -1.710342000000 |
| H | -0.574643000000 | -1.856747000000 | -3.227034000000 |
| H | -5.080895000000 | -1.441804000000 | 1.943915000000  |
| H | -6.182615000000 | -1.415529000000 | 0.569965000000  |
| H | -5.905311000000 | 0.919674000000  | 0.228781000000  |
| H | -5.630927000000 | 0.919844000000  | 1.968903000000  |
| H | -3.248159000000 | 1.185018000000  | 1.654808000000  |
| H | -3.791847000000 | 1.890012000000  | 0.149264000000  |
| C | 2.235682000000  | 3.775576000000  | -2.533128000000 |
| C | 0.911070000000  | 3.338723000000  | -2.443609000000 |
| C | 0.486687000000  | 2.685721000000  | -1.297215000000 |
| C | 1.384123000000  | 2.451045000000  | -0.248386000000 |

|   |                 |                |                 |
|---|-----------------|----------------|-----------------|
| C | 2.697181000000  | 2.885904000000 | -0.334577000000 |
| C | 3.121626000000  | 3.556216000000 | -1.483497000000 |
| C | -0.908503000000 | 2.151715000000 | -1.006418000000 |
| C | 0.756250000000  | 1.712465000000 | 0.911229000000  |
| C | -0.424021000000 | 2.546804000000 | 1.339275000000  |
| C | -1.298889000000 | 2.828394000000 | 0.289301000000  |
| C | -2.319438000000 | 3.750836000000 | 0.468425000000  |
| H | -2.965912000000 | 4.016549000000 | -0.362235000000 |
| C | -2.524172000000 | 4.317274000000 | 1.725172000000  |
| C | -1.699498000000 | 3.971985000000 | 2.792131000000  |
| C | -0.633321000000 | 3.094056000000 | 2.597352000000  |
| H | -1.610512000000 | 2.374978000000 | -1.812983000000 |
| H | 2.571765000000  | 4.293062000000 | -3.424032000000 |
| H | 0.219720000000  | 3.511660000000 | -3.261936000000 |
| H | 3.387026000000  | 2.696280000000 | 0.481293000000  |
| H | 4.145519000000  | 3.903339000000 | -1.559698000000 |
| H | 1.467270000000  | 1.562890000000 | 1.725555000000  |
| H | -3.327476000000 | 5.029682000000 | 1.871683000000  |
| H | -1.867910000000 | 4.409567000000 | 3.769130000000  |
| H | 0.043857000000  | 2.860329000000 | 3.412699000000  |
